# Supplementary material for: Kaempferol-3-O-Glucuronide Ameliorates Non-Alcoholic Steatohepatitis in High-Cholesterol-Diet-Induced Larval Zebrafish and HepG2 Cell Models via Regulating Oxidation Stress
Source: MDPI journal article supplement (doi:10.3390/life11050445), 2021-05-14
Supplement: s1 [file s1]

## Supplementary Materials:

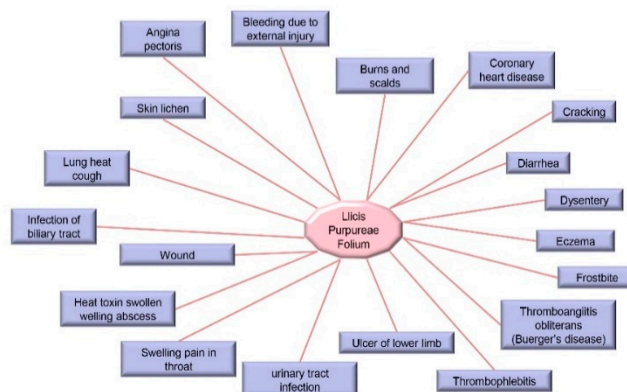

**Figure S1.** Ilicis Purpureae Folium related disease from network pharmacology. Based on the network pharmacology, the herb and disease relationship is shown in this picture.

**Table S1.** Ilicis Purpureae Folium related compounds and compound-target relation from network pharmacology.

| Herb                          | Compounds                                                                                                                                                                                                                                          |
|-------------------------------|----------------------------------------------------------------------------------------------------------------------------------------------------------------------------------------------------------------------------------------------------|
| <i>Ilcis Purpureae Folium</i> | Ilexoside B Methyl Ester                                                                                                                                                                                                                           |
| <i>Ilcis Purpureae Folium</i> | 3 $\beta$ -O-( $\beta$ -D-xylopyranosyl)pomolic acid methyl ester                                                                                                                                                                                  |
| <i>Ilcis Purpureae Folium</i> | cyclohexanone pedunculosyl-3                                                                                                                                                                                                                       |
| <i>Ilcis Purpureae Folium</i> | 23-o-acetal                                                                                                                                                                                                                                        |
| <i>Ilcis Purpureae Folium</i> | 2'-(o,m-dihydroxybenzyl)sweroside                                                                                                                                                                                                                  |
| <i>Ilcis Purpureae Folium</i> | rotundifoline                                                                                                                                                                                                                                      |
| <i>Ilcis Purpureae Folium</i> | myristic acid                                                                                                                                                                                                                                      |
| <i>Ilcis Purpureae Folium</i> | Pegaline                                                                                                                                                                                                                                           |
| <i>Ilcis Purpureae Folium</i> | (2R,4S)-4-hydroxypipicolinic acid                                                                                                                                                                                                                  |
| <i>Ilcis Purpureae Folium</i> | odontoside                                                                                                                                                                                                                                         |
| <i>Ilcis Purpureae Folium</i> | Protocatechuic acid-3-glucoside                                                                                                                                                                                                                    |
| <i>Ilcis Purpureae Folium</i> | Rotundic acid                                                                                                                                                                                                                                      |
| <i>Ilcis Purpureae Folium</i> | siaresinolic acid                                                                                                                                                                                                                                  |
| <i>Ilcis Purpureae Folium</i> | Isovanillic acid                                                                                                                                                                                                                                   |
| <i>Ilcis Purpureae Folium</i> | pegamine                                                                                                                                                                                                                                           |
| <i>Ilcis Purpureae Folium</i> | Ziyuglycoside I                                                                                                                                                                                                                                    |
| <i>Ilcis Purpureae Folium</i> | ursonic acid                                                                                                                                                                                                                                       |
| <i>Ilcis Purpureae Folium</i> | [(2S,3R,4S,5S,6R)-3,4,5-trihydroxy-6-(hydroxymethyl)oxan-2-yl]<br>(1R,2R,4aS,6aR,6aS,6bR,8aR,9R,10S,12aR,14bS)-1,10-dihydroxy-9-(hydroxymethyl)-1,2,6a,6b,9,12a-hexamethyl-2,3,4,5,6,6a,7,8,8a,10,11,12,13,14b-tetradecahydronicene-4a-carboxylate |
| <i>Ilcis Purpureae Folium</i> | Caffeate                                                                                                                                                                                                                                           |
| <i>Ilcis Purpureae Folium</i> | Geranylacetone                                                                                                                                                                                                                                     |
| <i>Ilcis Purpureae Folium</i> | Cinnamic acid, 3,4-dimethoxy- (8CI)                                                                                                                                                                                                                |
| <i>Ilcis Purpureae Folium</i> | Tannin                                                                                                                                                                                                                                             |
| <i>Ilcis Purpureae Folium</i> | Heriguard                                                                                                                                                                                                                                          |
| <i>Ilcis Purpureae Folium</i> | (6R,10R)-6,10,14-trimethylpentadecan-2-one                                                                                                                                                                                                         |
| <i>Ilcis Purpureae Folium</i> | ilexoside b methyl ester                                                                                                                                                                                                                           |
| <i>Ilcis Purpureae Folium</i> | (1S,4aR,6aR,6aS,6bR,8aR,10S,12aR,14bS)-1-hydroxy-2,2,6a,6b,9,9,12a-heptamethyl-10-[(2S,3R,4S,5R)-3,4,5-trihydroxyoxan-2-yl]oxy-1,3,4,5,6,6a,7,8,8a,10,11,12,13,14b-tetradecahydronicene-4a-carboxylic acid                                         |
| <i>Ilcis Purpureae Folium</i> | $\beta$ -sitosterol                                                                                                                                                                                                                                |
| <i>Ilcis Purpureae Folium</i> | kaempferol-3-O-glucuronide                                                                                                                                                                                                                         |
| <i>Ilcis Purpureae Folium</i> | WLN: Q1R                                                                                                                                                                                                                                           |
| <i>Ilcis Purpureae Folium</i> | syringin                                                                                                                                                                                                                                           |
| <i>Ilcis Purpureae Folium</i> | GENOP                                                                                                                                                                                                                                              |
| <i>Ilcis Purpureae Folium</i> | 6,6'-dimethoxygossypol                                                                                                                                                                                                                             |
| <i>Ilcis Purpureae Folium</i> | caprylic acid                                                                                                                                                                                                                                      |
| <i>Ilcis Purpureae Folium</i> | Pomolic acid                                                                                                                                                                                                                                       |
| <i>Ilcis Purpureae Folium</i> | Pomolic acid acetate                                                                                                                                                                                                                               |
| <i>Ilcis Purpureae Folium</i> | quercetin                                                                                                                                                                                                                                          |
| <i>Ilcis Purpureae Folium</i> | apigenin                                                                                                                                                                                                                                           |
| <i>Ilcis Purpureae Folium</i> | Sinapyl alcohol                                                                                                                                                                                                                                    |
| <i>Ilcis Purpureae Folium</i> | Stigmasterol                                                                                                                                                                                                                                       |
| <i>Ilcis Purpureae Folium</i> | kaempferol                                                                                                                                                                                                                                         |
| <i>Ilcis Purpureae Folium</i> | Trifolin                                                                                                                                                                                                                                           |
| <i>Ilcis Purpureae Folium</i> | Syrigin                                                                                                                                                                                                                                            |
| <i>Ilcis Purpureae Folium</i> | Daucosterol_qt                                                                                                                                                                                                                                     |
| <i>Ilcis Purpureae Folium</i> | PEL                                                                                                                                                                                                                                                |
| <i>Ilcis Purpureae Folium</i> | 3-hexenal                                                                                                                                                                                                                                          |
| <i>Ilcis Purpureae Folium</i> | (7aR)-4,4,7a-trimethyl-6,7-dihydro-5H-benzofuran-2-one                                                                                                                                                                                             |
| <i>Ilcis Purpureae Folium</i> | ursolic acid                                                                                                                                                                                                                                       |
| <i>Ilcis Purpureae Folium</i> | ZINC02038914                                                                                                                                                                                                                                       |
| <i>Ilcis Purpureae Folium</i> | caffeic acid                                                                                                                                                                                                                                       |
| <i>Ilcis Purpureae Folium</i> | protocatechuic acid                                                                                                                                                                                                                                |

| <i>Illicis Purpureae Folium</i> | 4-Formyl-2,6-xilenol |
|---------------------------------|----------------------|
| <i>Illicis Purpureae Folium</i> | Veratral             |
| <i>Illicis Purpureae Folium</i> | protocatechualdehyde |
| <i>Illicis Purpureae Folium</i> | hexanoic acid        |
| <i>Illicis Purpureae Folium</i> | palmitic acid        |
| Compound and target relation    |                      |
| <b>mol_name</b>                 | <b>gene_name</b>     |
| myristic acid                   | PPARA                |
| myristic acid                   | PAEP                 |
| myristic acid                   | PTGS2                |
| myristic acid                   | PRKACA               |
| myristic acid                   | PRKCA                |
| myristic acid                   | PRKCB                |
| myristic acid                   | PRKCD                |
| myristic acid                   | PRKCE                |
| myristic acid                   | PRKCG                |
| myristic acid                   | PRKCQ                |
| myristic acid                   | PRKACA               |
| myristic acid                   | RCVRN                |
| myristic acid                   | RHO                  |
| myristic acid                   | SEC14L2              |
| myristic acid                   | SEC14L2              |
| myristic acid                   | SEC14L2              |
| myristic acid                   | PPP3CA               |
| myristic acid                   | PPP3CA               |
| myristic acid                   | ALB                  |
| myristic acid                   | SLC22A8              |
| myristic acid                   | SLC22A11             |
| myristic acid                   | SLC22A6              |
| myristic acid                   | SLC22A8              |
| myristic acid                   | APOM                 |
| myristic acid                   | ARF6                 |
| myristic acid                   | TLR4                 |
| myristic acid                   | TRAPPC3              |
| myristic acid                   | TRAPPC3              |
| myristic acid                   | GLTP                 |
| myristic acid                   | HNF4A                |
| myristic acid                   | ABL1                 |
| myristic acid                   | ABL1                 |
| myristic acid                   | ABCB1                |
| myristic acid                   | ABCB1                |
| myristic acid                   | ABCB1                |
| myristic acid                   | XDH                  |
| myristic acid                   | ABL1                 |
| myristic acid                   | ABL1                 |
| myristic acid                   | PPP3R1               |
| myristic acid                   | PRKACA               |
| myristic acid                   | PKIA                 |
| myristic acid                   | PKIA                 |
| myristic acid                   | CYP2C8               |
| myristic acid                   | DCD                  |
| myristic acid                   | ABL1                 |
| myristic acid                   | ECI2                 |
| myristic acid                   | FABP4                |
| myristic acid                   | FABP3                |
| myristic acid                   | FABP5                |
| myristic acid                   | FABP5                |
| myristic acid                   | FABP4                |
| myristic acid                   | FABP3                |

|                  |         |
|------------------|---------|
| myristic acid    | FABP2   |
| myristic acid    | FKBP1A  |
| myristic acid    | FURIN   |
| myristic acid    | FURIN   |
| myristic acid    | GM2A    |
| myristic acid    | PAEP    |
| myristic acid    | GLTP    |
| myristic acid    | GLTP    |
| myristic acid    | GLTP    |
| myristic acid    | PLA2G2D |
| myristic acid    | GUCA1A  |
| myristic acid    | HNF4A   |
| myristic acid    | HNF4A   |
| myristic acid    | HNF4G   |
| myristic acid    | HNF4A   |
| myristic acid    | HNF4G   |
| myristic acid    | INS     |
| myristic acid    | ARF1    |
| myristic acid    | ARF1    |
| myristic acid    | ARF6    |
| myristic acid    | LY96    |
| myristic acid    | LY96    |
| myristic acid    | ALB     |
| myristic acid    | ABCB1   |
| myristic acid    | PMP2    |
| myristic acid    | NCOA1   |
| myristic acid    | ODC1    |
| myristic acid    | PPT1    |
| myristic acid    | FKBP1A  |
| myristic acid    | FKBP1A  |
| myristic acid    | PPARA   |
| myristic acid    | PPARG   |
| myristic acid    | ABCB1   |
| myristic acid    | LCAT    |
| myristic acid    | PLA2G2C |
| myristic acid    | PLA2G1B |
| myristic acid    | PLA2G2A |
| myristic acid    | PVR     |
| myristic acid    | GM2A    |
| Isovanillic acid | COMT    |
| Caffeate         | TYR     |
| Geranylacetone   | ANKRD45 |
| Geranylacetone   | HSPA9   |
| Geranylacetone   | HSPA1A  |
| Geranylacetone   | HSPA5   |
| Geranylacetone   | HSPA12A |
| Geranylacetone   | HSPA12B |
| Geranylacetone   | HSPA13  |
| Geranylacetone   | HSPA14  |
| Geranylacetone   | HSPA1B  |
| Geranylacetone   | HSPA1L  |
| Geranylacetone   | HSPA4   |
| Geranylacetone   | HSPA4L  |
| Geranylacetone   | HSPA6   |
| Geranylacetone   | HSPA8   |
| Geranylacetone   | HSPH1   |
| Geranylacetone   | HSPA2   |
| Tannin           | ANO1    |
| Tannin           | SLCO1B1 |

|                     |         |
|---------------------|---------|
| Tannin              | SLCO1B3 |
| Tannin              | ALOX12B |
| Tannin              | ALOX12  |
| Tannin              | ALOX15  |
| Tannin              | TBXAS1  |
| Tannin              | ALOX15B |
| Tannin              | ALOX5   |
| Tannin              | SI      |
| Tannin              | AKR1E2  |
| Tannin              | FYN     |
| Tannin              | LCK     |
| Tannin              | AKR1D1  |
| Tannin              | CLPB    |
| Tannin              | CYP1A2  |
| Tannin              | ALOXE3  |
| Tannin              | GCLM    |
| Tannin              | AKR1A1  |
| Tannin              | MAPK1   |
| Tannin              | MAPK14  |
| Tannin              | AKR1B10 |
| Tannin              | AKR1B15 |
| Tannin              | AKR1C1  |
| Tannin              | AKR1C2  |
| Tannin              | AKR1C3  |
| Tannin              | AKR1C4  |
| Tannin              | AKR1B1  |
| $\beta$ -sitosterol | PRKCA   |
| $\beta$ -sitosterol | PON1    |
| $\beta$ -sitosterol | APOE    |
| $\beta$ -sitosterol | BAX     |
| $\beta$ -sitosterol | BCL2    |
| $\beta$ -sitosterol | SREBF1  |
| $\beta$ -sitosterol | SREBF2  |
| $\beta$ -sitosterol | JUN     |
| $\beta$ -sitosterol | TGFB1   |
| $\beta$ -sitosterol | ABCB11  |
| $\beta$ -sitosterol | CASP3   |
| $\beta$ -sitosterol | CASP8   |
| $\beta$ -sitosterol | CASP9   |
| $\beta$ -sitosterol | DHCR24  |
| $\beta$ -sitosterol | ICAM1   |
| $\beta$ -sitosterol | MAP2    |
| WLN: Q1R            | CYP2E1  |
| WLN: Q1R            | CES4A   |
| WLN: Q1R            | CES5A   |
| WLN: Q1R            | N/A     |
| WLN: Q1R            | CYP2D6  |
| WLN: Q1R            | CYP2D6  |
| WLN: Q1R            | CYP2D6  |
| WLN: Q1R            | CYP2E1  |
| WLN: Q1R            | CYP1A1  |
| WLN: Q1R            | CYP3A4  |
| WLN: Q1R            | CYP2B6  |
| WLN: Q1R            | CYP1A1  |
| WLN: Q1R            | CYP1A2  |
| WLN: Q1R            | CYP2B6  |
| WLN: Q1R            | CYP2C8  |

|               |          |
|---------------|----------|
| WLN: Q1R      | CYP2D6   |
| WLN: Q1R      | CYP2E1   |
| WLN: Q1R      | CYP3A4   |
| WLN: Q1R      | CYP3A4   |
| WLN: Q1R      | CYP2D6   |
| WLN: Q1R      | CYP2B6   |
| WLN: Q1R      | CYP2D6   |
| WLN: Q1R      | CYP2E1   |
| WLN: Q1R      | CYP2D6   |
| WLN: Q1R      | CYP2E1   |
| WLN: Q1R      | GRIN3A   |
| WLN: Q1R      | GRIN3B   |
| WLN: Q1R      | GRIN2A   |
| WLN: Q1R      | GRIN2C   |
| WLN: Q1R      | GRIN2D   |
| WLN: Q1R      | CES1     |
| WLN: Q1R      | LYZ      |
| WLN: Q1R      | ALDH2    |
| WLN: Q1R      | CYP2D6   |
| WLN: Q1R      | CYP2D6   |
| WLN: Q1R      | CYP2D6   |
| GENOP         | PTGS1    |
| GENOP         | PTGS2    |
| GENOP         | SULT1A1  |
| GENOP         | CA2      |
| GENOP         | FGF1     |
| GENOP         | G6PD     |
| GENOP         | AOX1     |
| caprylic acid | PPARA    |
| caprylic acid | PAEP     |
| caprylic acid | PRKACA   |
| caprylic acid | PRKACA   |
| caprylic acid | LIPT2    |
| caprylic acid | PDHA1    |
| caprylic acid | RCVRN    |
| caprylic acid | RBP2     |
| caprylic acid | RHO      |
| caprylic acid | SEC14L2  |
| caprylic acid | SEC14L2  |
| caprylic acid | SEC14L2  |
| caprylic acid | PPP3CA   |
| caprylic acid | PPP3CA   |
| caprylic acid | ALB      |
| caprylic acid | SLC22A8  |
| caprylic acid | SLC22A11 |
| caprylic acid | SLC22A6  |
| caprylic acid | SLC22A8  |
| caprylic acid | APOM     |
| caprylic acid | ARF6     |
| caprylic acid | TLR4     |
| caprylic acid | TRAPPC3  |
| caprylic acid | TRAPPC3  |
| caprylic acid | GLTP     |
| caprylic acid | HNF4A    |
| caprylic acid | ABL1     |
| caprylic acid | ABL1     |

|               |         |
|---------------|---------|
| caprylic acid | ABCB1   |
| caprylic acid | ABCB1   |
| caprylic acid | ABCB1   |
| caprylic acid | ABL1    |
| caprylic acid | OXSM    |
| caprylic acid | ABL1    |
| caprylic acid | PPP3R1  |
| caprylic acid | PRKACA  |
| caprylic acid | PKIA    |
| caprylic acid | PKIA    |
| caprylic acid | ALDH9A1 |
| caprylic acid | CYP2C8  |
| caprylic acid | ABL1    |
| caprylic acid | ACACB   |
| caprylic acid | ECI2    |
| caprylic acid | FABP4   |
| caprylic acid | FABP3   |
| caprylic acid | FABP5   |
| caprylic acid | FABP5   |
| caprylic acid | FABP4   |
| caprylic acid | FABP3   |
| caprylic acid | FABP2   |
| caprylic acid | FABP1   |
| caprylic acid | ALDH3A2 |
| caprylic acid | FKBP1A  |
| caprylic acid | FURIN   |
| caprylic acid | FURIN   |
| caprylic acid | GM2A    |
| caprylic acid | MBOAT4  |
| caprylic acid | PAEP    |
| caprylic acid | GLTP    |
| caprylic acid | GLTP    |
| caprylic acid | GLTP    |
| caprylic acid | PLA2G2D |
| caprylic acid | GUCA1A  |
| caprylic acid | HNF4A   |
| caprylic acid | HNF4A   |
| caprylic acid | HNF4G   |
| caprylic acid | EP300   |
| caprylic acid | HNF4A   |
| caprylic acid | HNF4G   |
| caprylic acid | INS     |
| caprylic acid | CXCL8   |
| caprylic acid | IAH1    |
| caprylic acid | ARF1    |
| caprylic acid | ARF1    |
| caprylic acid | ARF6    |
| caprylic acid | ACSL1   |
| caprylic acid | ACSL3   |
| caprylic acid | ACSL4   |
| caprylic acid | ACSL5   |
| caprylic acid | ACSL6   |
| caprylic acid | ACSBG1  |
| caprylic acid | LY96    |
| caprylic acid | LY96    |
| caprylic acid | ALB     |
| caprylic acid | ALDH1B1 |
| caprylic acid | ABCB1   |
| caprylic acid | PMP2    |

|               |          |
|---------------|----------|
| caprylic acid | NCOA1    |
| caprylic acid | PPT1     |
| caprylic acid | FKBP1A   |
| caprylic acid | FKBP1A   |
| caprylic acid | PPARA    |
| caprylic acid | PPARG    |
| caprylic acid | ABCB1    |
| caprylic acid | PLA2G2C  |
| caprylic acid | PLA2G1B  |
| caprylic acid | PLA2G2A  |
| caprylic acid | PVR      |
| caprylic acid | GM2A     |
| quercetin     | CYP24A1  |
| quercetin     | SCMH1    |
| quercetin     | GALNT1   |
| quercetin     | GALNT10  |
| quercetin     | GALNT3   |
| quercetin     | LSMEM1   |
| quercetin     | FIG4     |
| quercetin     | PTBP1    |
| quercetin     | PTBP2    |
| quercetin     | CLP1     |
| quercetin     | POPDC2   |
| quercetin     | KCNU1    |
| quercetin     | PIK3CG   |
| quercetin     | TRMT61B  |
| quercetin     | POU2AF1  |
| quercetin     | PQLC3    |
| quercetin     | PRDM10   |
| quercetin     | ARL6IP5  |
| quercetin     | PBX3     |
| quercetin     | NR1I2    |
| quercetin     | LMNA     |
| quercetin     | PRELID2  |
| quercetin     | RABAC1   |
| quercetin     | PRKRIP1  |
| quercetin     | DDX20    |
| quercetin     | DDX58    |
| quercetin     | SCNN1A   |
| quercetin     | DHX40    |
| quercetin     | MTHFD2L  |
| quercetin     | ATP13A1  |
| quercetin     | DIMT1    |
| quercetin     | APOBEC3B |
| quercetin     | HECTD2   |
| quercetin     | SLC18B1  |
| quercetin     | TRIP12   |
| quercetin     | C14orf1  |
| quercetin     | GPX8     |
| quercetin     | METTTL18 |
| quercetin     | GPR160   |
| quercetin     | USP35    |
| quercetin     | MAOA     |
| quercetin     | GPR83    |
| quercetin     | HELZ     |
| quercetin     | AMDHD1   |
| quercetin     | LMBRD1   |
| quercetin     | C7orf60  |
| quercetin     | TARBP1   |



|           |          |
|-----------|----------|
| quercetin | NAT8     |
| quercetin | IFI27L1  |
| quercetin | ZDHHC23  |
| quercetin | MAOB     |
| quercetin | ATP8B1   |
| quercetin | ATP9A    |
| quercetin | SLC7A6OS |
| quercetin | RBM19    |
| quercetin | RBM23    |
| quercetin | CPVL     |
| quercetin | MARCH3   |
| quercetin | OSGEPL1  |
| quercetin | MN1      |
| quercetin | XPNPEP3  |
| quercetin | PCOLCE   |
| quercetin | PCOLCE2  |
| quercetin | PLOD2    |
| quercetin | ACY1     |
| quercetin | EGF      |
| quercetin | EREG     |
| quercetin | AMT      |
| quercetin | PAQR3    |
| quercetin | PAQR9    |
| quercetin | ANKH     |
| quercetin | HBEGF    |
| quercetin | PCNA     |
| quercetin | PA2G4    |
| quercetin | PROSC    |
| quercetin | PSRC1    |
| quercetin | PRAP1    |
| quercetin | AMMECR1  |
| quercetin | PRR15    |
| quercetin | PRR7     |
| quercetin | PRRT1    |
| quercetin | PSTPIP1  |
| quercetin | P4HA1    |
| quercetin | AMPD2    |
| quercetin | TMEM159  |
| quercetin | PROM1    |
| quercetin | AMPD3    |
| quercetin | PCCA     |
| quercetin | PCSK5    |
| quercetin | PCSK9    |
| quercetin | PROX1    |
| quercetin | PTGES3   |
| quercetin | PTGER3   |
| quercetin | PTGFRN   |
| quercetin | PTGS1    |
| quercetin | PTGS2    |
| quercetin | PTGR1    |
| quercetin | PTGR2    |
| quercetin | PSCA     |
| quercetin | KLK3     |
| quercetin | ACPP     |
| quercetin | ADRM1    |
| quercetin | PSME4    |
| quercetin | PSMG1    |
| quercetin | PSMG4    |
| quercetin | MLLT3    |

|           |          |
|-----------|----------|
| quercetin | AMN1     |
| quercetin | PRMT5    |
| quercetin | EIF2C2   |
| quercetin | APBA3    |
| quercetin | ASTE1    |
| quercetin | BSN      |
| quercetin | BEX1     |
| quercetin | BTG1     |
| quercetin | BTG2     |
| quercetin | C3orf33  |
| quercetin | CASC5    |
| quercetin | RUNX1T1  |
| quercetin | APBB2    |
| quercetin | KIAA1524 |
| quercetin | CYR61    |
| quercetin | DBF4     |
| quercetin | DEK      |
| quercetin | DEPP     |
| quercetin | P4HB     |
| quercetin | PDIA3    |
| quercetin | TMX3     |
| quercetin | DOPEY1   |
| quercetin | DPY30    |
| quercetin | MRPS31   |
| quercetin | ECT2     |
| quercetin | EFR3A    |
| quercetin | ENAH     |
| quercetin | LMAN1    |
| quercetin | FADD     |
| quercetin | FAM102B  |
| quercetin | FAM110B  |
| quercetin | APLP1    |
| quercetin | FAM117A  |
| quercetin | FAM13A   |
| quercetin | FAM13B   |
| quercetin | FAM150B  |
| quercetin | ROBO1    |
| quercetin | FAM162A  |
| quercetin | FAM171A1 |
| quercetin | FAM177A1 |
| quercetin | FAM193A  |
| quercetin | FAM198B  |
| quercetin | FAM19A4  |
| quercetin | FAM19A5  |
| quercetin | FAM212B  |
| quercetin | C21orf59 |
| quercetin | FAM3B    |
| quercetin | FAM46A   |
| quercetin | FAM46B   |
| quercetin | FAM46C   |
| quercetin | FAM50A   |
| quercetin | FAM53C   |
| quercetin | ANAPC10  |
| quercetin | FAM98A   |
| quercetin | FAM98B   |
| quercetin | RPGRIP1L |
| quercetin | FEM1C    |
| quercetin | C6orf48  |
| quercetin | HEXIM2   |

|           |           |
|-----------|-----------|
| quercetin | HOOK1     |
| quercetin | HOOK2     |
| quercetin | HOOK3     |
| quercetin | INTU      |
| quercetin | JAG1      |
| quercetin | KHNYN     |
| quercetin | WWC1      |
| quercetin | PRKCA     |
| quercetin | ANAPC4    |
| quercetin | PRKCB     |
| quercetin | PRKCI     |
| quercetin | PRKCQ     |
| quercetin | ELOB      |
| quercetin | PKDCC     |
| quercetin | DNAAF2    |
| quercetin | KTI12     |
| quercetin | TMBIM4    |
| quercetin | LIN28B    |
| quercetin | AR        |
| quercetin | OIP5      |
| quercetin | KIAA0753  |
| quercetin | NKD2      |
| quercetin | NDRG1     |
| quercetin | NDRG2     |
| quercetin | NIPSNAP3A |
| quercetin | METTL21A  |
| quercetin | FAM114A1  |
| quercetin | NTAN1     |
| quercetin | OSR2      |
| quercetin | PTCH1     |
| quercetin | PELO      |
| quercetin | PPP1R15A  |
| quercetin | PPP1R16A  |
| quercetin | PPP1R1A   |
| quercetin | PPP1R3C   |
| quercetin | PPP1R3D   |
| quercetin | PPM1D     |
| quercetin | PPM1H     |
| quercetin | PPM1M     |
| quercetin | PBRM1     |
| quercetin | AIG1      |
| quercetin | PRUNE     |
| quercetin | BBS9      |
| quercetin | RIPPLY3   |
| quercetin | SSUH2     |
| quercetin | S100A1    |
| quercetin | S100A11   |
| quercetin | S100A13   |
| quercetin | S100A16   |
| quercetin | S100A2    |
| quercetin | S100A3    |
| quercetin | S100A6    |
| quercetin | S100P     |
| quercetin | ANG       |
| quercetin | SMG9      |
| quercetin | MRPS6     |
| quercetin | SPRY1     |
| quercetin | TIMELESS  |
| quercetin | AMOTL2    |

|           |           |
|-----------|-----------|
| quercetin | SEC24D    |
| quercetin | TEK       |
| quercetin | TTYH3     |
| quercetin | UNC50     |
| quercetin | WNT11     |
| quercetin | WWC2      |
| quercetin | TIFA      |
| quercetin | SPACIA2   |
| quercetin | YPEL2     |
| quercetin | SERPINA10 |
| quercetin | ZWILCH    |
| quercetin | F2R       |
| quercetin | F2RL1     |
| quercetin | TGM2      |
| quercetin | ANGPTL4   |
| quercetin | SLC44A5   |
| quercetin | LOX       |
| quercetin | METTL21B  |
| quercetin | TESK2     |
| quercetin | METTL10   |
| quercetin | N6AMT2    |
| quercetin | MICAL1    |
| quercetin | MICAL3    |
| quercetin | PTK6      |
| quercetin | TPST2     |
| quercetin | F2        |
| quercetin | MAP3K21   |
| quercetin | ZNF260    |
| quercetin | PCDHB2    |
| quercetin | FOS       |
| quercetin | FRAT1     |
| quercetin | MOS       |
| quercetin | AGT       |
| quercetin | RET       |
| quercetin | SRC       |
| quercetin | TGFA      |
| quercetin | GULP1     |
| quercetin | RAI14     |
| quercetin | PLEKHG4   |
| quercetin | PNP       |
| quercetin | NPEPPS    |
| quercetin | BTBD11    |
| quercetin | HCK       |
| quercetin | PHTF1     |
| quercetin | PHTF2     |
| quercetin | MOGAT1    |
| quercetin | NSUN6     |
| quercetin | HS3ST5    |
| quercetin | ANKMY2    |
| quercetin | UBAP1L    |
| quercetin | RAB42     |
| quercetin | RBM3      |
| quercetin | SLC38A11  |
| quercetin | PUS10     |
| quercetin | C6orf52   |
| quercetin | ZNF552    |
| quercetin | ANKS4B    |
| quercetin | RBP1      |
| quercetin | PYCR2     |

|           |          |
|-----------|----------|
| quercetin | PKM2     |
| quercetin | MOGAT2   |
| quercetin | TP53I3   |
| quercetin | CRYZL1   |
| quercetin | GDI1     |
| quercetin | CHML     |
| quercetin | RABEPK   |
| quercetin | AKT1     |
| quercetin | RINT1    |
| quercetin | RAD51AP1 |
| quercetin | IER3     |
| quercetin | RSAD1    |
| quercetin | RSAD2    |
| quercetin | RAF1     |
| quercetin | RALGDS   |
| quercetin | RGL1     |
| quercetin | RANBP10  |
| quercetin | RANBP6   |
| quercetin | RBCK1    |
| quercetin | RAPGEF2  |
| quercetin | ASB2     |
| quercetin | RASSF1   |
| quercetin | RASA1    |
| quercetin | IQGAP1   |
| quercetin | IQGAP2   |
| quercetin | RAPH1    |
| quercetin | RAB1B    |
| quercetin | RAB20    |
| quercetin | RAB23    |
| quercetin | ASB9     |
| quercetin | RAB28    |
| quercetin | RAB3B    |
| quercetin | RAB40B   |
| quercetin | RAB8B    |
| quercetin | ANKRD10  |
| quercetin | RALA     |
| quercetin | RALB     |
| quercetin | RRAS     |
| quercetin | ANKRD12  |
| quercetin | RCBTB1   |
| quercetin | RAMP1    |
| quercetin | REEP6    |
| quercetin | ERBB2    |
| quercetin | ERBB3    |
| quercetin | RIPK1    |
| quercetin | RIPK2    |
| quercetin | RIPK3    |
| quercetin | RIPK4    |
| quercetin | FLT3     |
| quercetin | PTPRG    |
| quercetin | PTPRH    |
| quercetin | PTPRK    |
| quercetin | PTPRN2   |
| quercetin | ANKRD16  |
| quercetin | PTPRU    |
| quercetin | MGA      |
| quercetin | RGN      |
| quercetin | RGCC     |
| quercetin | RGS1     |

|           |           |
|-----------|-----------|
| quercetin | RGS10     |
| quercetin | RGS19     |
| quercetin | RGS2      |
| quercetin | RGS20     |
| quercetin | RGS5      |
| quercetin | RGS7      |
| quercetin | UPF3B     |
| quercetin | RFXAP     |
| quercetin | PPP1R13L  |
| quercetin | RFC3      |
| quercetin | RFC4      |
| quercetin | RMND1     |
| quercetin | DNAJC3    |
| quercetin | RTN4IP1   |
| quercetin | ALDH1A1   |
| quercetin | AOC2      |
| quercetin | RB1       |
| quercetin | RARB      |
| quercetin | RARRES2   |
| quercetin | RXRG      |
| quercetin | GPRC5A    |
| quercetin | RDH12     |
| quercetin | RBP4      |
| quercetin | PEG10     |
| quercetin | ASPRV1    |
| quercetin | RECK      |
| quercetin | ARHGDIB   |
| quercetin | ARHGAP11A |
| quercetin | PCNX4     |
| quercetin | ANKRD37   |
| quercetin | ARHGAP17  |
| quercetin | ARHGAP19  |
| quercetin | ARHGAP27  |
| quercetin | ARHGAP44  |
| quercetin | ARHGEF3   |
| quercetin | ROCK1     |
| quercetin | ROCK2     |
| quercetin | RHBDD2    |
| quercetin | RHBDD3    |
| quercetin | RHBDL2    |
| quercetin | RHOBTB1   |
| quercetin | RHOBTB3   |
| quercetin | RND1      |
| quercetin | RHOC      |
| quercetin | RHOF      |
| quercetin | RHOU      |
| quercetin | ANKRD5    |
| quercetin | RBKS      |
| quercetin | DROSHA    |
| quercetin | RNASEH2A  |
| quercetin | RPP38     |
| quercetin | RPP40     |
| quercetin | HACL1     |
| quercetin | RAVER2    |
| quercetin | RRM1      |
| quercetin | RRM2      |
| quercetin | RRM2B     |
| quercetin | RSL1D1    |
| quercetin | RPS6KA1   |

|           |          |
|-----------|----------|
| quercetin | RPS6KA3  |
| quercetin | RRP7A    |
| quercetin | WDR12    |
| quercetin | RRS1     |
| quercetin | RRBP1    |
| quercetin | NQO2     |
| quercetin | RPE      |
| quercetin | RILPL2   |
| quercetin | RNFT1    |
| quercetin | RNF141   |
| quercetin | RNF24    |
| quercetin | C4orf48  |
| quercetin | RTCA     |
| quercetin | ELL2     |
| quercetin | RPAP1    |
| quercetin | RBMS1    |
| quercetin | RBMS2    |
| quercetin | RBM12    |
| quercetin | UGT8     |
| quercetin | RBM24    |
| quercetin | RBM38    |
| quercetin | RBM4     |
| quercetin | RBM45    |
| quercetin | RBM4B    |
| quercetin | ANKRA2   |
| quercetin | ZFP69    |
| quercetin | RUFY1    |
| quercetin | ANK2     |
| quercetin | FBXO30   |
| quercetin | RUNDC3B  |
| quercetin | RUNX2    |
| quercetin | RUVBL2   |
| quercetin | RWDD2A   |
| quercetin | RWDD2B   |
| quercetin | NUDT14   |
| quercetin | ANXA1    |
| quercetin | SCAPER   |
| quercetin | SACS     |
| quercetin | SALL1    |
| quercetin | SASH1    |
| quercetin | SAMHD1   |
| quercetin | ATP2A1   |
| quercetin | SAFB     |
| quercetin | SAFB2    |
| quercetin | ANXA2    |
| quercetin | STIL     |
| quercetin | SCFD2    |
| quercetin | SFRP1    |
| quercetin | FRZB     |
| quercetin | ANXA6    |
| quercetin | PTTG1    |
| quercetin | BSCL2    |
| quercetin | SELENBP1 |
| quercetin | SEMA3C   |
| quercetin | SEMA3F   |
| quercetin | SEMA3G   |

|           |          |
|-----------|----------|
| quercetin | SEMA4G   |
| quercetin | SENP7    |
| quercetin | SQSTM1   |
| quercetin | LACTB    |
| quercetin | SERINC2  |
| quercetin | METTL12  |
| quercetin | SPTLC3   |
| quercetin | HPN      |
| quercetin | RSRC1    |
| quercetin | SRSF1    |
| quercetin | SRSF3    |
| quercetin | AGR2     |
| quercetin | SRSF7    |
| quercetin | STK17B   |
| quercetin | STYX     |
| quercetin | PIM1     |
| quercetin | STK16    |
| quercetin | STK17A   |
| quercetin | STK17B   |
| quercetin | STK38    |
| quercetin | STK40    |
| quercetin | ATR      |
| quercetin | CHEK2    |
| quercetin | PRKD1    |
| quercetin | PRKD3    |
| quercetin | ANTXR2   |
| quercetin | MASTL    |
| quercetin | UHMK1    |
| quercetin | CDC42BPB |
| quercetin | MTOR     |
| quercetin | PKN1     |
| quercetin | NEK1     |
| quercetin | NEK2     |
| quercetin | NEK4     |
| quercetin | NIM1K    |
| quercetin | NLK      |
| quercetin | TAP1     |
| quercetin | PDIK1L   |
| quercetin | PIM1     |
| quercetin | PIM2     |
| quercetin | PIM3     |
| quercetin | PLK1     |
| quercetin | PLK2     |
| quercetin | PLK3     |
| quercetin | PRPF4B   |
| quercetin | SGK1     |
| quercetin | SMG1     |
| quercetin | STK11    |
| quercetin | TAOK3    |
| quercetin | TBK1     |
| quercetin | TLK1     |
| quercetin | VRK1     |
| quercetin | VRK2     |
| quercetin | ERN1     |
| quercetin | ERN2     |
| quercetin | PPP2R1B  |
| quercetin | PPP2R4   |
| quercetin | PPP2R3C  |
| quercetin | PPP3CA   |



|           |          |
|-----------|----------|
| quercetin | SERPINC1 |
| quercetin | PPP4R4   |
| quercetin | PPP6R2   |
| quercetin | SERPINB3 |
| quercetin | SERPINB9 |
| quercetin | SERTAD1  |
| quercetin | ALB      |
| quercetin | SDPR     |
| quercetin | PON1     |
| quercetin | PON2     |
| quercetin | SESN1    |
| quercetin | SESN2    |
| quercetin | SESN3    |
| quercetin | SETD5    |
| quercetin | SCML2    |
| quercetin | SHBG     |
| quercetin | SHBG     |
| quercetin | AP1M2    |
| quercetin | SHBG     |
| quercetin | SH2D5    |
| quercetin | AP1S1    |
| quercetin | MPHOSPH9 |
| quercetin | SH2B3    |
| quercetin | SH3PXD2A |
| quercetin | SH3BGR   |
| quercetin | SH3BGRL  |
| quercetin | SH3BGRL2 |
| quercetin | SH3BGRL3 |
| quercetin | SH3BP2   |
| quercetin | SH3D19   |
| quercetin | SH3YL1   |
| quercetin | ACADSB   |
| quercetin | SDR42E1  |
| quercetin | SGO2     |
| quercetin | LRP5L    |
| quercetin | STAT1    |
| quercetin | SOBP     |
| quercetin | AP3M2    |
| quercetin | SSBP1    |
| quercetin | PDS5B    |
| quercetin | MIS18BP1 |
| quercetin | SRGAP3   |
| quercetin | ZNF581   |
| quercetin | UTP20    |
| quercetin | EFCAB11  |
| quercetin | BHMT2    |
| quercetin | SMTN     |
| quercetin | AP5M1    |
| quercetin | SNAPC4   |
| quercetin | SLC6A12  |
| quercetin | SLC6A8   |
| quercetin | SLC6A11  |
| quercetin | SLC4A7   |
| quercetin | SLC4A11  |
| quercetin | SCLT1    |
| quercetin | SCN1A    |
| quercetin | SCN9A    |
| quercetin | AICF     |
| quercetin | SLC9A6   |

|           |          |
|-----------|----------|
| quercetin | SLC9A8   |
| quercetin | SLC5A3   |
| quercetin | ATP1A1   |
| quercetin | NKAIN1   |
| quercetin | ATP1B3   |
| quercetin | FXVD2    |
| quercetin | APOA5    |
| quercetin | GUCD1    |
| quercetin | SLC38A1  |
| quercetin | SLC38A2  |
| quercetin | SLC38A4  |
| quercetin | SLC38A9  |
| quercetin | APOB     |
| quercetin | SLC17A2  |
| quercetin | SLC20A1  |
| quercetin | SLC6A4   |
| quercetin | APOC2    |
| quercetin | SLC12A2  |
| quercetin | SLC12A4  |
| quercetin | SLC13A5  |
| quercetin | SLC16A1  |
| quercetin | SLC16A7  |
| quercetin | SLC17A9  |
| quercetin | SLC2A1   |
| quercetin | APOE     |
| quercetin | SLC2A10  |
| quercetin | SLC2A14  |
| quercetin | SLC2A2   |
| quercetin | SLC2A3   |
| quercetin | SLC2A4   |
| quercetin | SLC2A5   |
| quercetin | APOF     |
| quercetin | SLC2A7   |
| quercetin | SLC2A8   |
| quercetin | SLC2A9   |
| quercetin | APOLD1   |
| quercetin | SLC22A15 |
| quercetin | GBE1     |
| quercetin | SLC22A3  |
| quercetin | SLC22A5  |
| quercetin | SLC22A9  |
| quercetin | SLC23A1  |
| quercetin | SLC25A39 |
| quercetin | APOM     |
| quercetin | SLC25A43 |
| quercetin | SLC25A45 |
| quercetin | SLC25A46 |
| quercetin | SLC35F5  |
| quercetin | SLC35G2  |
| quercetin | SLC40A1  |
| quercetin | SLC41A1  |
| quercetin | SLC41A2  |
| quercetin | BCL2L14  |
| quercetin | SLCO2B1  |
| quercetin | SLCO2B1  |
| quercetin | SLCO4A1  |
| quercetin | SLCO4C1  |
| quercetin | BAX      |
| quercetin | SLCO2B1  |

|           |          |
|-----------|----------|
| quercetin | HSD3B7   |
| quercetin | SOS1     |
| quercetin | SORBS2   |
| quercetin | BCL2     |
| quercetin | CDCA5    |
| quercetin | SNX14    |
| quercetin | SNX24    |
| quercetin | SNX7     |
| quercetin | SNX8     |
| quercetin | OBFC2A   |
| quercetin | SPAST    |
| quercetin | AEN      |
| quercetin | SPTBN1   |
| quercetin | AIFM1    |
| quercetin | SPA17    |
| quercetin | SPAG1    |
| quercetin | SPAG16   |
| quercetin | SPAG5    |
| quercetin | STRBP    |
| quercetin | SPATA2L  |
| quercetin | SMOX     |
| quercetin | SKP2     |
| quercetin | TP53BP2  |
| quercetin | SASS6    |
| quercetin | SPIN3    |
| quercetin | SF3A2    |
| quercetin | SF3B3    |
| quercetin | SF3B4    |
| quercetin | APAF1    |
| quercetin | SPOCD1   |
| quercetin | SPSB1    |
| quercetin | SQLE     |
| quercetin | FDFT1    |
| quercetin | SKAP2    |
| quercetin | CTTN     |
| quercetin | STC1     |
| quercetin | STC2     |
| quercetin | STBD1    |
| quercetin | STARD13  |
| quercetin | STARD9   |
| quercetin | STMN1    |
| quercetin | AQP11    |
| quercetin | SAMD9    |
| quercetin | SOAT1    |
| quercetin | SOAT2    |
| quercetin | SREBF1   |
| quercetin | NSDHL    |
| quercetin | AQP3     |
| quercetin | STK17B   |
| quercetin | SDF2L1   |
| quercetin | SMAP1    |
| quercetin | MMP3     |
| quercetin | MMP10    |
| quercetin | MMP11    |
| quercetin | SMC2     |
| quercetin | SMC3     |
| quercetin | SMC6     |
| quercetin | ADH6     |
| quercetin | TOR1AIP1 |

|           |          |
|-----------|----------|
| quercetin | FPGT     |
| quercetin | C11orf80 |
| quercetin | HSD3B1   |
| quercetin | ALOX12B  |
| quercetin | ZNF788   |
| quercetin | VEGFA    |
| quercetin | ALOX12   |
| quercetin | CYP51A1  |
| quercetin | SKIDA1   |
| quercetin | ALOX15   |
| quercetin | ALOX15B  |
| quercetin | LMO7     |
| quercetin | MFN1     |
| quercetin | ALOX5    |
| quercetin | GCKR     |
| quercetin | STAU2    |
| quercetin | CYP4F12  |
| quercetin | HSD3B2   |
| quercetin | FNDC5    |
| quercetin | FDXR     |
| quercetin | ALOX5AP  |
| quercetin | TTLL3    |
| quercetin | OTUD6B   |
| quercetin | ATXN3    |
| quercetin | SLC3A2   |
| quercetin | GPRC5C   |
| quercetin | PPM1K    |
| quercetin | EXOC5    |
| quercetin | ZFP41    |
| quercetin | NCEH1    |
| quercetin | TAB3     |
| quercetin | RGMB     |
| quercetin | MROH8    |
| quercetin | MYD88    |
| quercetin | EFCAB8   |
| quercetin | N/A      |
| quercetin | ECD      |
| quercetin | HPR      |
| quercetin | BAK1     |
| quercetin | ANKHD1   |
| quercetin | IRAK4    |
| quercetin | MUC15    |
| quercetin | SDHC     |
| quercetin | ALDH5A1  |
| quercetin | SUCLG2   |
| quercetin | ASAP2    |
| quercetin | SLC37A2  |
| quercetin | SLC26A2  |
| quercetin | QSOX1    |
| quercetin | SQRDL    |
| quercetin | SUOX     |
| quercetin | SULT1A1  |
| quercetin | SULT1A2  |
| quercetin | SULT1C2  |
| quercetin | ARG1     |
| quercetin | SKIV2L2  |
| quercetin | ARG2     |
| quercetin | SOD1     |
| quercetin | SAPCD2   |

|           |          |
|-----------|----------|
| quercetin | SOCS4    |
| quercetin | SOCS6    |
| quercetin | ST7L     |
| quercetin | SUSD3    |
| quercetin | SRPX     |
| quercetin | SRPX2    |
| quercetin | VAT1     |
| quercetin | SYNGR3   |
| quercetin | SYCE2    |
| quercetin | SYTL1    |
| quercetin | SYTL4    |
| quercetin | MATK     |
| quercetin | SYNC     |
| quercetin | SDC2     |
| quercetin | ASS1     |
| quercetin | SDC4     |
| quercetin | SYBU     |
| quercetin | STX16    |
| quercetin | STX1A    |
| quercetin | STX3     |
| quercetin | STX5     |
| quercetin | STXBP5   |
| quercetin | TAC4     |
| quercetin | TAF5L    |
| quercetin | WRB      |
| quercetin | TNKS     |
| quercetin | SMIM3    |
| quercetin | TAF1A    |
| quercetin | ARVCF    |
| quercetin | TBCK     |
| quercetin | FBXO11   |
| quercetin | TBC1D7   |
| quercetin | TBC1D8   |
| quercetin | TBC1D8B  |
| quercetin | TBC1D9   |
| quercetin | TBX3     |
| quercetin | FAM209B  |
| quercetin | CD7      |
| quercetin | TCTA     |
| quercetin | CD3D     |
| quercetin | TCP11L1  |
| quercetin | TCTEX1D2 |
| quercetin | TSHZ1    |
| quercetin | AKR1E2   |
| quercetin | TEP1     |
| quercetin | TERT     |
| quercetin | ARMCX5   |
| quercetin | TNS1     |
| quercetin | TEX19    |
| quercetin | DDC      |
| quercetin | TEX9     |
| quercetin | TSSK1B   |
| quercetin | TSSK2    |
| quercetin | TSSK3    |
| quercetin | TSSK4    |
| quercetin | TSPYL2   |
| quercetin | TSPYL4   |
| quercetin | FAM208A  |
| quercetin | ASPSCR1  |

|           |          |
|-----------|----------|
| quercetin | ARRDC2   |
| quercetin | TSPAN3   |
| quercetin | TSPAN4   |
| quercetin | TSPAN5   |
| quercetin | TSPAN8   |
| quercetin | ARRDC3   |
| quercetin | TTC14    |
| quercetin | TTC17    |
| quercetin | TTC27    |
| quercetin | TTC30B   |
| quercetin | TTC33    |
| quercetin | TTC39C   |
| quercetin | MRPL13   |
| quercetin | TTC7B    |
| quercetin | TGFBR2   |
| quercetin | THAP10   |
| quercetin | THAP2    |
| quercetin | SLC19A3  |
| quercetin | CRYM     |
| quercetin | TXNDC15  |
| quercetin | TXNDC16  |
| quercetin | AHR      |
| quercetin | TXNRD1   |
| quercetin | TST      |
| quercetin | THOC1    |
| quercetin | THNSL1   |
| quercetin | CDKAL1   |
| quercetin | THBD     |
| quercetin | ARNT     |
| quercetin | THBS1    |
| quercetin | THBS2    |
| quercetin | ARNTL    |
| quercetin | TYMS     |
| quercetin | THYN1    |
| quercetin | TMSB10   |
| quercetin | ARNTL2   |
| quercetin | AHRR     |
| quercetin | SERPINA7 |
| quercetin | TIGD1    |
| quercetin | TIGD2    |
| quercetin | TJP1     |
| quercetin | AHR      |
| quercetin | TJP2     |
| quercetin | TIPIN    |
| quercetin | TICAM1   |
| quercetin | F3       |
| quercetin | TFPI     |
| quercetin | TFPI2    |
| quercetin | PLAT     |
| quercetin | TM2D3    |
| quercetin | TRAF4    |
| quercetin | TLR1     |
| quercetin | TLR10    |
| quercetin | TLR2     |
| quercetin | TLR4     |
| quercetin | TLR6     |
| quercetin | TMEFF1   |
| quercetin | TONSL    |
| quercetin | TOR2A    |

|           |          |
|-----------|----------|
| quercetin | TP53RK   |
| quercetin | TTMP     |
| quercetin | ARSE     |
| quercetin | TRAPPC10 |
| quercetin | TRAPPC2  |
| quercetin | TRAPPC6A |
| quercetin | ARSG     |
| quercetin | TALDO1   |
| quercetin | TCEAL8   |
| quercetin | TEFM     |
| quercetin | TCF12    |
| quercetin | TFAM     |
| quercetin | JUN      |
| quercetin | BTF3L4   |
| quercetin | CEBPB    |
| quercetin | TFDP2    |
| quercetin | E2F1     |
| quercetin | E2F2     |
| quercetin | E2F3     |
| quercetin | E2F5     |
| quercetin | E2F7     |
| quercetin | ASGR1    |
| quercetin | GATA6    |
| quercetin | HES1     |
| quercetin | HES4     |
| quercetin | HIVEP2   |
| quercetin | JUNB     |
| quercetin | JUND     |
| quercetin | MAFF     |
| quercetin | MAFG     |
| quercetin | RELA     |
| quercetin | RELB     |
| quercetin | SOX30    |
| quercetin | SP1      |
| quercetin | SP5      |
| quercetin | GTF2E2   |
| quercetin | TAF3     |
| quercetin | TAF5     |
| quercetin | TAF9     |
| quercetin | TAF9B    |
| quercetin | TRIM24   |
| quercetin | MTERF2   |
| quercetin | MYB      |
| quercetin | TADA1    |
| quercetin | TFRC     |
| quercetin | TRRAP    |
| quercetin | TRA2A    |
| quercetin | TGFB1    |
| quercetin | TGFB1I1  |
| quercetin | TAGLN    |
| quercetin | ASPHD1   |
| quercetin | TRPM7    |
| quercetin | TRPV1    |
| quercetin | TRPV2    |
| quercetin | DARS     |
| quercetin | TKT      |
| quercetin | GUF1     |
| quercetin | EIF2B2   |
| quercetin | MTIF2    |

|           |           |
|-----------|-----------|
| quercetin | MTIF3     |
| quercetin | TRAM1L1   |
| quercetin | SSR3      |
| quercetin | TM4SF1    |
| quercetin | TM7SF3    |
| quercetin | TMC7      |
| quercetin | ASPH      |
| quercetin | TMED6     |
| quercetin | GPNMB     |
| quercetin | FHIT      |
| quercetin | TMPRSS11D |
| quercetin | TMPRSS11F |
| quercetin | TMEM117   |
| quercetin | TMEM126A  |
| quercetin | TMEM128   |
| quercetin | KIAA0922  |
| quercetin | TMEM135   |
| quercetin | TMEM138   |
| quercetin | PEA15     |
| quercetin | TMEM139   |
| quercetin | TMEM140   |
| quercetin | TMEM14A   |
| quercetin | TMEM165   |
| quercetin | TMEM168   |
| quercetin | TMEM170B  |
| quercetin | TMEM187   |
| quercetin | TMEM19    |
| quercetin | TMEM192   |
| quercetin | TMEM2     |
| quercetin | TMEM222   |
| quercetin | C17orf75  |
| quercetin | TMEM41B   |
| quercetin | TMEM45A   |
| quercetin | TMEM54    |
| quercetin | TMEM60    |
| quercetin | TMEM64    |
| quercetin | TMEM65    |
| quercetin | TMEM68    |
| quercetin | TMEM80    |
| quercetin | TMEM9B    |
| quercetin | C1orf162  |
| quercetin | C9orf91   |
| quercetin | ATL1      |
| quercetin | TTR       |
| quercetin | ATL2      |
| quercetin | TFF1      |
| quercetin | TRIB1     |
| quercetin | TRIB2     |
| quercetin | TRIB3     |
| quercetin | SLC25A1   |
| quercetin | TREM2     |
| quercetin | TRIOBP    |
| quercetin | TPI1      |
| quercetin | TRIM47    |
| quercetin | ZC2HC1C   |
| quercetin | TRIM59    |
| quercetin | TPP1      |
| quercetin | ATP5MC2   |
| quercetin | ZFP36     |



|           |           |
|-----------|-----------|
| quercetin | TRMT11    |
| quercetin | TYW3      |
| quercetin | TSEN15    |
| quercetin | TPBG      |
| quercetin | TPM1      |
| quercetin | TPM4      |
| quercetin | TNNC1     |
| quercetin | TNNI2     |
| quercetin | ATP5F1A   |
| quercetin | CYP1B1    |
| quercetin | MRPL20    |
| quercetin | ATP5B     |
| quercetin | ATP5F1B   |
| quercetin | TSC2      |
| quercetin | TUBA1A    |
| quercetin | TUBB      |
| quercetin | TUBB1     |
| quercetin | TUBB2B    |
| quercetin | TUBB6     |
| quercetin | TUBD1     |
| quercetin | TDRD3     |
| quercetin | TDRD7     |
| quercetin | TUFT1     |
| quercetin | TNF       |
| quercetin | TNFAIP8   |
| quercetin | TNFSF10   |
| quercetin | TNFSF4    |
| quercetin | FASLG     |
| quercetin | TNFRSF10A |
| quercetin | TNFRSF10B |
| quercetin | TNFRSF10D |
| quercetin | HSPE1     |
| quercetin | TNFRSF11A |
| quercetin | TNFRSF11B |
| quercetin | TNFRSF12A |
| quercetin | TNFRSF14  |
| quercetin | TNFRSF19  |
| quercetin | TNFRSF1B  |
| quercetin | TNFRSF21  |
| quercetin | EDA2R     |
| quercetin | FAS       |
| quercetin | ATP5F1C   |
| quercetin | TP63      |
| quercetin | TP53INP1  |
| quercetin | TP73      |
| quercetin | TSG101    |
| quercetin | DIO1      |
| quercetin | AGTR1     |
| quercetin | TYR       |
| quercetin | HCK       |
| quercetin | JAK1      |
| quercetin | ABL1      |
| quercetin | ABL2      |
| quercetin | BLK       |
| quercetin | BTK       |
| quercetin | CSK       |
| quercetin | FGR       |
| quercetin | FYN       |
| quercetin | HCK       |

|           |         |
|-----------|---------|
| quercetin | ITK     |
| quercetin | JAK1    |
| quercetin | JAK2    |
| quercetin | JAK3    |
| quercetin | LCK     |
| quercetin | LYN     |
| quercetin | MERTK   |
| quercetin | MRPL23  |
| quercetin | TIE1    |
| quercetin | TYRO3   |
| quercetin | AXL     |
| quercetin | RYK     |
| quercetin | SRMS    |
| quercetin | STYK1   |
| quercetin | SYK     |
| quercetin | TEC     |
| quercetin | ROR1    |
| quercetin | TXK     |
| quercetin | YES1    |
| quercetin | ZAP70   |
| quercetin | YARS2   |
| quercetin | ABCA1   |
| quercetin | TDP2    |
| quercetin | IMP3    |
| quercetin | UTP18   |
| quercetin | SART1   |
| quercetin | LSM4    |
| quercetin | ABCA12  |
| quercetin | USP13   |
| quercetin | ABCA5   |
| quercetin | USP4    |
| quercetin | USP43   |
| quercetin | USP46   |
| quercetin | UCHL3   |
| quercetin | ABCA7   |
| quercetin | UBD     |
| quercetin | UFD1L   |
| quercetin | OTUB2   |
| quercetin | UBASH3B |
| quercetin | UBAP2   |
| quercetin | UBE2E2  |
| quercetin | UBE2L3  |
| quercetin | UBE2Q2  |
| quercetin | UFM1    |
| quercetin | UBA1    |
| quercetin | UBA5    |
| quercetin | UBL3    |
| quercetin | ISG15   |
| quercetin | ATG3    |
| quercetin | UBE3B   |
| quercetin | UGT3A1  |
| quercetin | SLC35A2 |
| quercetin | B3GNTL1 |
| quercetin | UXS1    |
| quercetin | SLC35D1 |
| quercetin | UGT3A1  |
| quercetin | UGT1A1  |
| quercetin | UGT1A10 |
| quercetin | UGT1A3  |

|           |           |
|-----------|-----------|
| quercetin | UGT1A4    |
| quercetin | UGT1A5    |
| quercetin | UGT1A6    |
| quercetin | UGT1A7    |
| quercetin | UGT1A8    |
| quercetin | UGT1A9    |
| quercetin | UGT2A1    |
| quercetin | UGT2A3    |
| quercetin | UGT2B10   |
| quercetin | UGT2B11   |
| quercetin | UGT2B15   |
| quercetin | UGT2B17   |
| quercetin | UGT2B28   |
| quercetin | UGT2B4    |
| quercetin | UGT2B7    |
| quercetin | UGT3A1    |
| quercetin | UGT3A2    |
| quercetin | ALG13     |
| quercetin | ALG14     |
| quercetin | UAP1L1    |
| quercetin | UFSP2     |
| quercetin | CMFK2     |
| quercetin | UNC5CL    |
| quercetin | MFSD11    |
| quercetin | ABCB1     |
| quercetin | C11orf52  |
| quercetin | C11orf96  |
| quercetin | C12orf60  |
| quercetin | C14orf118 |
| quercetin | C14orf28  |
| quercetin | PRRC2B    |
| quercetin | C16orf45  |
| quercetin | CEL       |
| quercetin | C17orf62  |
| quercetin | ZNF225    |
| quercetin | ABCD3     |
| quercetin | C19orf18  |
| quercetin | C1orf115  |
| quercetin | SAP18     |
| quercetin | C1orf64   |
| quercetin | C22orf25  |
| quercetin | C2orf72   |
| quercetin | C2orf82   |
| quercetin | C3orf38   |
| quercetin | C3orf62   |
| quercetin | C4orf3    |
| quercetin | C5orf34   |
| quercetin | C6orf226  |
| quercetin | C7orf50   |
| quercetin | C7orf58   |
| quercetin | C8orf4    |
| quercetin | C9orf152  |
| quercetin | C9orf85   |
| quercetin | ABCG2     |
| quercetin | KIAA0528  |
| quercetin | KIAA0556  |
| quercetin | KIAA0895L |
| quercetin | KIAA1211  |
| quercetin | MYO1B     |

|           |          |
|-----------|----------|
| quercetin | ABCG5    |
| quercetin | MYO5A    |
| quercetin | MYO7A    |
| quercetin | ABCG8    |
| quercetin | URB2     |
| quercetin | C16orf58 |
| quercetin | C19orf25 |
| quercetin | C17orf58 |
| quercetin | KIAA0907 |
| quercetin | ABCC1    |
| quercetin | C20orf94 |
| quercetin | C1orf216 |
| quercetin | C2orf76  |
| quercetin | C16orf87 |
| quercetin | C7orf55  |
| quercetin | ABCC1    |
| quercetin | C4orf27  |
| quercetin | ABCC1    |
| quercetin | ABCC1    |
| quercetin | ABCB1    |
| quercetin | UCN      |
| quercetin | PLAU     |
| quercetin | UPK3A    |
| quercetin | ABCB1    |
| quercetin | UROD     |
| quercetin | USP6NL   |
| quercetin | UGP2     |
| quercetin | VPS16    |
| quercetin | VPS54    |
| quercetin | VPS36    |
| quercetin | VANGL1   |
| quercetin | ABCG2    |
| quercetin | VCAM1    |
| quercetin | VEGFA    |
| quercetin | FIGF     |
| quercetin | FLT1     |
| quercetin | ABCG2    |
| quercetin | KDR      |
| quercetin | FLT4     |
| quercetin | MPC2     |
| quercetin | VIPR1    |
| quercetin | VASN     |
| quercetin | SLC27A2  |
| quercetin | ACADVL   |
| quercetin | VLDLR    |
| quercetin | GOLT1A   |
| quercetin | SFT2D2   |
| quercetin | CLPX     |
| quercetin | SEC22A   |
| quercetin | PIF1     |
| quercetin | VIL1     |
| quercetin | VSNL1    |
| quercetin | RECQL    |
| quercetin | PROC     |
| quercetin | PROS1    |
| quercetin | VTN      |
| quercetin | VDAC1    |
| quercetin | VHL      |
| quercetin | VSIG10L  |

|           |          |
|-----------|----------|
| quercetin | VSIG2    |
| quercetin | ATP6V0B  |
| quercetin | ATP6V1C1 |
| quercetin | DDX39A   |
| quercetin | ATP6V0E2 |
| quercetin | KIAA0196 |
| quercetin | WDFY1    |
| quercetin | WSB1     |
| quercetin | WDSUB1   |
| quercetin | PIEZO2   |
| quercetin | WDR34    |
| quercetin | WDR41    |
| quercetin | WDR44    |
| quercetin | WDR47    |
| quercetin | WDR53    |
| quercetin | WDR54    |
| quercetin | WDR5B    |
| quercetin | WDR61    |
| quercetin | WDR66    |
| quercetin | WDR7     |
| quercetin | MIOS     |
| quercetin | DHX29    |
| quercetin | WBP1L    |
| quercetin | WWTR1    |
| quercetin | XDH      |
| quercetin | XBP1     |
| quercetin | YAP1     |
| quercetin | YRDC     |
| quercetin | ZBTB10   |
| quercetin | ZBTB2    |
| quercetin | ZBTB38   |
| quercetin | KCNJ10   |
| quercetin | FBXO31   |
| quercetin | ZSCAN21  |
| quercetin | ZSCAN4   |
| quercetin | ZBED3    |
| quercetin | ZBED5    |
| quercetin | HEMK2    |
| quercetin | C13orf34 |
| quercetin | ZC3H6    |
| quercetin | ZC3H7A   |
| quercetin | KCNJ14   |
| quercetin | MTFR2    |
| quercetin | ZCCHC2   |
| quercetin | ZCCHC7   |
| quercetin | ZFYVE1   |
| quercetin | ZFYVE16  |
| quercetin | ZMAT3    |
| quercetin | ZMYM6    |
| quercetin | ZNF112   |
| quercetin | ZNF117   |
| quercetin | ZNF138   |
| quercetin | ZFP161   |
| quercetin | ZNF165   |
| quercetin | EID3     |
| quercetin | ZNF184   |
| quercetin | ZNF189   |
| quercetin | NPR3     |
| quercetin | ZNF217   |

|           |          |
|-----------|----------|
| quercetin | ZNF227   |
| quercetin | ZNF23    |
| quercetin | ZNF248   |
| quercetin | RPL18A   |
| quercetin | ARID2    |
| quercetin | ZNF280A  |
| quercetin | SMIM19   |
| quercetin | ZNF30    |
| quercetin | ZNF337   |
| quercetin | ZNF33B   |
| quercetin | ZFP36L1  |
| quercetin | ZNF362   |
| quercetin | ZFP37    |
| quercetin | ZNF385B  |
| quercetin | SHPRH    |
| quercetin | ZNF395   |
| quercetin | AURKA    |
| quercetin | ZNF439   |
| quercetin | ZNF440   |
| quercetin | ZNF441   |
| quercetin | PTCHD4   |
| quercetin | AURKB    |
| quercetin | ZNF513   |
| quercetin | AAED1    |
| quercetin | FAM117B  |
| quercetin | ZNF555   |
| quercetin | ZNF557   |
| quercetin | ZNF559   |
| quercetin | ZNF561   |
| quercetin | ZNF565   |
| quercetin | ZNF57    |
| quercetin | ZNF573   |
| quercetin | ARHGEF28 |
| quercetin | MRPL39   |
| quercetin | ATG16L2  |
| quercetin | ZNF580   |
| quercetin | ATG2A    |
| quercetin | ZNF594   |
| quercetin | FAM193B  |
| quercetin | ZNF600   |
| quercetin | ZNF608   |
| quercetin | ZNF624   |
| quercetin | TCF19    |
| quercetin | TMEM156  |
| quercetin | ZNF639   |
| quercetin | ZNF652   |
| quercetin | FAM209A  |
| quercetin | REEP3    |
| quercetin | ZNF684   |
| quercetin | AXIN2    |
| quercetin | ZNF700   |
| quercetin | ZNF708   |
| quercetin | ZNF711   |
| quercetin | ZFP69B   |
| quercetin | ZNF789   |
| quercetin | ZNF79    |
| quercetin | SLC7A9   |
| quercetin | ZNF84    |
| quercetin | PLAG1    |

|           |          |
|-----------|----------|
| quercetin | PLAGL1   |
| quercetin | RLF      |
| quercetin | SNAI1    |
| quercetin | C6orf1   |
| quercetin | ZIC2     |
| quercetin | ZFPL1    |
| quercetin | ZSWIM5   |
| quercetin | ZSWIM6   |
| quercetin | ZFX      |
| quercetin | ZXDB     |
| quercetin | ZHX2     |
| quercetin | SLC30A1  |
| quercetin | SLC30A10 |
| quercetin | SLC30A2  |
| quercetin | SLC30A3  |
| quercetin | SLC30A4  |
| quercetin | SLC30A5  |
| quercetin | SLC30A6  |
| quercetin | SLC30A7  |
| quercetin | SLC30A8  |
| quercetin | SLC39A10 |
| quercetin | SLC39A11 |
| quercetin | SLC39A14 |
| quercetin | SLC39A4  |
| quercetin | ZG16B    |
| quercetin | BIRC5    |
| quercetin | NOP9     |
| quercetin | BAG2     |
| quercetin | BAG4     |
| quercetin | EPB41L1  |
| quercetin | EPB41L5  |
| quercetin | BBS12    |
| quercetin | BBS2     |
| quercetin | BBS4     |
| quercetin | BBS5     |
| quercetin | BCAM     |
| quercetin | BIVM     |
| quercetin | BSG      |
| quercetin | MRPL47   |
| quercetin | MRPL49   |
| quercetin | MRPL50   |
| quercetin | BAD      |
| quercetin | BNIP3    |
| quercetin | BNIP3L   |
| quercetin | BIK      |
| quercetin | BCL2L1   |
| quercetin | BCL2L2   |
| quercetin | BOK      |
| quercetin | BCL2A1   |
| quercetin | BCOR     |
| quercetin | ACTB     |
| quercetin | B3GALT1  |
| quercetin | RFNG     |
| quercetin | B4GALNT1 |
| quercetin | HMGCR    |
| quercetin | B4GALT4  |
| quercetin | SNTB1    |
| quercetin | APOH     |
| quercetin | ARRB1    |

|           |           |
|-----------|-----------|
| quercetin | ACTR1B    |
| quercetin | CHN2      |
| quercetin | PTPLB     |
| quercetin | CRYGS     |
| quercetin | ST6GAL1   |
| quercetin | HEXB      |
| quercetin | BHMT      |
| quercetin | LACTB2    |
| quercetin | BACE1     |
| quercetin | NAPB      |
| quercetin | BDH2      |
| quercetin | BFAR      |
| quercetin | PNKP      |
| quercetin | NR1H4     |
| quercetin | HIBCH     |
| quercetin | BAAT      |
| quercetin | SULT2A1   |
| quercetin | BLOC1S2   |
| quercetin | ACAA2     |
| quercetin | BLM       |
| quercetin | BAMBI     |
| quercetin | BMP1      |
| quercetin | BMP2      |
| quercetin | BMP4      |
| quercetin | BMP8A     |
| quercetin | BDNF      |
| quercetin | BCAT1     |
| quercetin | FAM175A   |
| quercetin | BCR       |
| quercetin | BCAR1     |
| quercetin | BCAR3     |
| quercetin | GTF2H4    |
| quercetin | ABCG2     |
| quercetin | BRCA1     |
| quercetin | BRCA2     |
| quercetin | AKR1D1    |
| quercetin | ARFGEF1   |
| quercetin | ARFGEF3   |
| quercetin | BAZ1A     |
| quercetin | BAZ2B     |
| quercetin | BRDT      |
| quercetin | BRD2      |
| quercetin | BRD7      |
| quercetin | KCTD13    |
| quercetin | BTBD2     |
| quercetin | KCTD14    |
| quercetin | BCKDK     |
| quercetin | KCTD6     |
| quercetin | C1GALT1C1 |
| quercetin | C2CD4A    |
| quercetin | C2CD2     |
| quercetin | C4BPA     |
| quercetin | C4BPB     |
| quercetin | C5AR1     |
| quercetin | ZMPSTE24  |
| quercetin | CAD       |
| quercetin | CDH1      |
| quercetin | CDH11     |
| quercetin | CDH2      |



|           |          |
|-----------|----------|
| quercetin | ZBTB21   |
| quercetin | CAMK1    |
| quercetin | CAMK2B   |
| quercetin | SLC25A12 |
| quercetin | SLC25A24 |
| quercetin | CADPS2   |
| quercetin | CACYBP   |
| quercetin | RPS23    |
| quercetin | CLGN     |
| quercetin | CLMN     |
| quercetin | CAMTA2   |
| quercetin | CAMKMT   |
| quercetin | CAMSAP3  |
| quercetin | CAPN15   |
| quercetin | CAPN2    |
| quercetin | TRIAP1   |
| quercetin | PDE4C    |
| quercetin | ABCC2    |
| quercetin | FAU      |
| quercetin | CLIP2    |
| quercetin | EVA1B    |
| quercetin | CAPRIN2  |
| quercetin | CHST13   |
| quercetin | CHST15   |
| quercetin | CHST3    |
| quercetin | CA2      |
| quercetin | CBR1     |
| quercetin | CBR4     |
| quercetin | N/A      |
| quercetin | CMBL     |
| quercetin | CPB2     |
| quercetin | CPN1     |
| quercetin | CPN2     |
| quercetin | CPQ      |
| quercetin | INTS13   |
| quercetin | CEACAM5  |
| quercetin | CRLS1    |
| quercetin | CPT1A    |
| quercetin | CPT1B    |
| quercetin | CPT2     |
| quercetin | CARNMT1  |
| quercetin | RAPSN    |
| quercetin | CASD1    |
| quercetin | CSNK2A1  |
| quercetin | CSNK2B   |
| quercetin | CSNK2A1  |
| quercetin | CSNK2A2  |
| quercetin | CSNK2B   |
| quercetin | CFLAR    |
| quercetin | CASP1    |
| quercetin | CASP3    |
| quercetin | CASP6    |
| quercetin | CASP8    |
| quercetin | CASP9    |
| quercetin | CAT      |
| quercetin | CTNNA1   |
| quercetin | CTNNB1   |
| quercetin | CTSB     |
| quercetin | CTSD     |

|           |          |
|-----------|----------|
| quercetin | EPHA6    |
| quercetin | CATSPER3 |
| quercetin | CAV1     |
| quercetin | CITED1   |
| quercetin | CITED2   |
| quercetin | CCR6     |
| quercetin | CCR7     |
| quercetin | CCL2     |
| quercetin | CEBPA    |
| quercetin | CEBPB    |
| quercetin | CNOT8    |
| quercetin | CD109    |
| quercetin | CD151    |
| quercetin | CD302    |
| quercetin | CD40LG   |
| quercetin | SFN      |
| quercetin | PRKAB1   |
| quercetin | CD59     |
| quercetin | CD63     |
| quercetin | CD83     |
| quercetin | CD9      |
| quercetin | CD97     |
| quercetin | CABLES1  |
| quercetin | CDK5RAP2 |
| quercetin | SHBG     |
| quercetin | PGS1     |
| quercetin | CEBPB    |
| quercetin | CADM1    |
| quercetin | ANGPTL8  |
| quercetin | CCPG1    |
| quercetin | CIDEC    |
| quercetin | CIDEB    |
| quercetin | RQCD1    |
| quercetin | NT5E     |
| quercetin | CDC45    |
| quercetin | CDC6     |
| quercetin | CDC7     |
| quercetin | CDC16    |
| quercetin | CDC20    |
| quercetin | CDCA7L   |
| quercetin | CDCA3    |
| quercetin | TP53     |
| quercetin | CNTRL    |
| quercetin | CENPC1   |
| quercetin | CENPF    |
| quercetin | CENPI    |
| quercetin | CENPJ    |
| quercetin | CENPK    |
| quercetin | ITGB3BP  |
| quercetin | MLF1IP   |
| quercetin | STRA13   |
| quercetin | ZW10     |
| quercetin | CENPE    |
| quercetin | TRAPPC11 |
| quercetin | CEP128   |
| quercetin | CEP135   |
| quercetin | CEP170B  |
| quercetin | CEP55    |
| quercetin | CEP68    |

|           |            |
|-----------|------------|
| quercetin | CEP70      |
| quercetin | CEP72      |
| quercetin | CEP78      |
| quercetin | UGCG       |
| quercetin | CERS5      |
| quercetin | CDR2L      |
| quercetin | ALAS1      |
| quercetin | KIAA1551   |
| quercetin | CLN5       |
| quercetin | CP         |
| quercetin | SEC11C     |
| quercetin | MAP3K20    |
| quercetin | CKLF       |
| quercetin | SLC26A3    |
| quercetin | PRKAB2     |
| quercetin | CYP46A1    |
| quercetin | CHKA       |
| quercetin | SLC44A3    |
| quercetin | CSGALNACT2 |
| quercetin | CHPF       |
| quercetin | CHAF1B     |
| quercetin | CBX5       |
| quercetin | CBX6       |
| quercetin | CHD1L      |
| quercetin | CHD2       |
| quercetin | CHTF18     |
| quercetin | CHTF8      |
| quercetin | KIF4A      |
| quercetin | CTRL       |
| quercetin | CGNL1      |
| quercetin | CLYBL      |
| quercetin | CMTM7      |
| quercetin | BHLHE40    |
| quercetin | CLTB       |
| quercetin | HECTD4     |
| quercetin | CLDN1      |
| quercetin | CLDN10     |
| quercetin | CLDN14     |
| quercetin | CLDN4      |
| quercetin | CSTF2      |
| quercetin | SLC35A1    |
| quercetin | CDRT4      |
| quercetin | COTL1      |
| quercetin | F7         |
| quercetin | F10        |
| quercetin | COPE       |
| quercetin | MMAB       |
| quercetin | CFL1       |
| quercetin | STAG1      |
| quercetin | CCHCR1     |
| quercetin | CC2D1B     |
| quercetin | CCDC109B   |
| quercetin | CCDC126    |
| quercetin | CCDC130    |
| quercetin | CCDC138    |
| quercetin | CCDC15     |
| quercetin | CCDC17     |
| quercetin | CCDC62     |
| quercetin | CCDC68     |

|           |          |
|-----------|----------|
| quercetin | CCDC69   |
| quercetin | HSPA1A   |
| quercetin | CCDC81   |
| quercetin | CCDC92   |
| quercetin | FBXO17   |
| quercetin | COIL     |
| quercetin | CIRBP    |
| quercetin | COL1A1   |
| quercetin | COL2A1   |
| quercetin | COL3A1   |
| quercetin | COL7A1   |
| quercetin | COL18A1  |
| quercetin | ESR2     |
| quercetin | CTHRC1   |
| quercetin | COLEC12  |
| quercetin | TMEM27   |
| quercetin | COMMD1   |
| quercetin | COMMD10  |
| quercetin | COMMD8   |
| quercetin | C5       |
| quercetin | CD93     |
| quercetin | C8A      |
| quercetin | C8B      |
| quercetin | C8G      |
| quercetin | CD55     |
| quercetin | CFB      |
| quercetin | CFI      |
| quercetin | OCC1     |
| quercetin | NCAPG    |
| quercetin | NCAPG2   |
| quercetin | CTGF     |
| quercetin | COG5     |
| quercetin | COG6     |
| quercetin | FAM120C  |
| quercetin | COPS4    |
| quercetin | COPS5    |
| quercetin | CPNE2    |
| quercetin | CUTC     |
| quercetin | ATP7A    |
| quercetin | ATP7B    |
| quercetin | CORO2A   |
| quercetin | CORO2B   |
| quercetin | SERPINA6 |
| quercetin | NR2F2    |
| quercetin | RPL15    |
| quercetin | CRP      |
| quercetin | CKB      |
| quercetin | CREBBP   |
| quercetin | CSNK2A1  |
| quercetin | CTC1     |
| quercetin | OBFC1    |
| quercetin | CTPS1    |
| quercetin | CUZD1    |
| quercetin | CUEDC1   |
| quercetin | CUEDC2   |
| quercetin | CELF1    |
| quercetin | CUL4B    |
| quercetin | CXCR4    |
| quercetin | CXCL10   |

|           |         |
|-----------|---------|
| quercetin | CXCL11  |
| quercetin | CXCL16  |
| quercetin | CXCL2   |
| quercetin | ATF3    |
| quercetin | RPL27A  |
| quercetin | CREB3L2 |
| quercetin | CREB3L3 |
| quercetin | CCNA2   |
| quercetin | CDK1    |
| quercetin | CDK2    |
| quercetin | CDK4    |
| quercetin | CDKN2B  |
| quercetin | CDKN2C  |
| quercetin | CDK5R1  |
| quercetin | CDK6    |
| quercetin | CDK8    |
| quercetin | CDK9    |
| quercetin | CDKN1A  |
| quercetin | CDKN1B  |
| quercetin | CDKN1C  |
| quercetin | CDKN2A  |
| quercetin | CDKN3   |
| quercetin | CCNF    |
| quercetin | CCNG2   |
| quercetin | CBS     |
| quercetin | CSTA    |
| quercetin | CSRP2   |
| quercetin | CHORDC1 |
| quercetin | CDO1    |
| quercetin | HSD17B6 |
| quercetin | CRIPT   |
| quercetin | CFTR    |
| quercetin | SLC7A11 |
| quercetin | CDA     |
| quercetin | CYBB    |
| quercetin | CYBA    |
| quercetin | CYB5A   |
| quercetin | CYCS    |
| quercetin | COX11   |
| quercetin | COX19   |
| quercetin | CYP1B1  |
| quercetin | CYP11B1 |
| quercetin | CYP1A1  |
| quercetin | CYP1A2  |
| quercetin | CYP1B1  |
| quercetin | CYP20A1 |
| quercetin | CYP26A1 |
| quercetin | CYP26B1 |
| quercetin | CYP26C1 |
| quercetin | CYP2C8  |
| quercetin | CYP2C9  |
| quercetin | CYP2D6  |
| quercetin | CYP2E1  |
| quercetin | CYP2J2  |
| quercetin | CYP2S1  |
| quercetin | CYP3A4  |
| quercetin | CYP3A5  |
| quercetin | CYP4A11 |
| quercetin | CYP4A22 |

|           |          |
|-----------|----------|
| quercetin | CYP4B1   |
| quercetin | CYP4F11  |
| quercetin | CYP4F22  |
| quercetin | CYP4V2   |
| quercetin | CYP4X1   |
| quercetin | PFKFB3   |
| quercetin | CYP4Z1   |
| quercetin | PFKFB4   |
| quercetin | CYP1B1   |
| quercetin | CYGB     |
| quercetin | PFKP     |
| quercetin | CRLF1    |
| quercetin | CRLF3    |
| quercetin | BMX      |
| quercetin | AGTPBP1  |
| quercetin | PGD      |
| quercetin | DRD4     |
| quercetin | PHGDH    |
| quercetin | NUDT1    |
| quercetin | BDH1     |
| quercetin | APPL2    |
| quercetin | DCUN1D2  |
| quercetin | MMP2     |
| quercetin | DCAF16   |
| quercetin | DCAF5    |
| quercetin | DCAF6    |
| quercetin | DAPK1    |
| quercetin | PDSS2    |
| quercetin | DOCK4    |
| quercetin | DOCK5    |
| quercetin | CYP8B1   |
| quercetin | DHRS13   |
| quercetin | DHRS7    |
| quercetin | DHCR7    |
| quercetin | DHCR24   |
| quercetin | ALDH4A1  |
| quercetin | DENND1A  |
| quercetin | DENR     |
| quercetin | DTL      |
| quercetin | DCK      |
| quercetin | DNTTIP2  |
| quercetin | DNASE1L1 |
| quercetin | DEPTOR   |
| quercetin | DEPDC1   |
| quercetin | DEPDC1B  |
| quercetin | DEPDC7   |
| quercetin | DSE      |
| quercetin | DSC2     |
| quercetin | DSTN     |
| quercetin | DRG2     |
| quercetin | RASD1    |
| quercetin | GLCE     |
| quercetin | DGKA     |
| quercetin | DGAT2    |
| quercetin | SAT1     |
| quercetin | DKK4     |
| quercetin | DEF8     |
| quercetin | DHFRL1   |
| quercetin | DLD      |

|           |          |
|-----------|----------|
| quercetin | QDPR     |
| quercetin | DPYSL2   |
| quercetin | DPYSL4   |
| quercetin | DPYD     |
| quercetin | TFB1M    |
| quercetin | FMO5     |
| quercetin | CYP1B1   |
| quercetin | CTSC     |
| quercetin | DPP4     |
| quercetin | MVD      |
| quercetin | DAB2     |
| quercetin | DCBLD2   |
| quercetin | DIP2A    |
| quercetin | ADAM12   |
| quercetin | ADAM15   |
| quercetin | ADAM9    |
| quercetin | DLG1     |
| quercetin | DLGAP5   |
| quercetin | DIRC2    |
| quercetin | ZNF850   |
| quercetin | DMXL1    |
| quercetin | DMXL2    |
| quercetin | DNMT1    |
| quercetin | DDB2     |
| quercetin | DDIT3    |
| quercetin | DDIT4    |
| quercetin | DRAM1    |
| quercetin | APOBEC3G |
| quercetin | RBBP8    |
| quercetin | ERCC1    |
| quercetin | ERCC6L   |
| quercetin | DFFA     |
| quercetin | DFFB     |
| quercetin | N/A      |
| quercetin | INO80    |
| quercetin | MSH2     |
| quercetin | MSH6     |
| quercetin | POLA1    |
| quercetin | POLD2    |
| quercetin | POLD4    |
| quercetin | POLE     |
| quercetin | POLE2    |
| quercetin | POLH     |
| quercetin | POLQ     |
| quercetin | REV3L    |
| quercetin | ABCG2    |
| quercetin | RAD54B   |
| quercetin | RAD54L   |
| quercetin | XPC      |
| quercetin | ERCC5    |
| quercetin | XRCC3    |
| quercetin | GIN54    |
| quercetin | CDT1     |
| quercetin | TOP1     |
| quercetin | ABHD14B  |
| quercetin | TOP2A    |
| quercetin | TOP2B    |
| quercetin | TOP3A    |
| quercetin | TOP3B    |

|           |          |
|-----------|----------|
| quercetin | TOP1MT   |
| quercetin | SATB2    |
| quercetin | PRKDC    |
| quercetin | ZNRD1    |
| quercetin | ABHD4    |
| quercetin | POLR3B   |
| quercetin | POLR3D   |
| quercetin | POLR3G   |
| quercetin | POLR1D   |
| quercetin | DNAJA1   |
| quercetin | DNAJB2   |
| quercetin | DNAJB4   |
| quercetin | DNAJC12  |
| quercetin | DNAJC2   |
| quercetin | ASPM     |
| quercetin | DOK6     |
| quercetin | DOLK     |
| quercetin | DPM2     |
| quercetin | DPM3     |
| quercetin | ALG6     |
| quercetin | ALG10    |
| quercetin | DCDC2    |
| quercetin | MRE11A   |
| quercetin | DPH3     |
| quercetin | DYDC2    |
| quercetin | DRAP1    |
| quercetin | DBN1     |
| quercetin | DTWD1    |
| quercetin | DUOX1    |
| quercetin | DUOX2    |
| quercetin | DSTYK    |
| quercetin | MAP2K3   |
| quercetin | MAP2K4   |
| quercetin | MAP2K6   |
| quercetin | DUSP28   |
| quercetin | CLK1     |
| quercetin | TTK      |
| quercetin | DUSP1    |
| quercetin | DUSP4    |
| quercetin | DUSP5    |
| quercetin | DUSP6    |
| quercetin | TESK1    |
| quercetin | XPO1     |
| quercetin | DNHD1    |
| quercetin | DYNLL1   |
| quercetin | DYNLT3   |
| quercetin | HERC5    |
| quercetin | EGR2     |
| quercetin | KIAA1586 |
| quercetin | CCNB1IP1 |
| quercetin | UBE3D    |
| quercetin | FANCL    |
| quercetin | HERC2    |
| quercetin | MIB2     |
| quercetin | MYLIP    |
| quercetin | NEDD4L   |
| quercetin | PELI3    |
| quercetin | RBBP6    |
| quercetin | RFWD3    |



|           |          |
|-----------|----------|
| quercetin | RFFL     |
| quercetin | RNF14    |
| quercetin | RNF146   |
| quercetin | RNF19B   |
| quercetin | RNF213   |
| quercetin | RNF43    |
| quercetin | SH3RF1   |
| quercetin | SIAH1    |
| quercetin | SIAH2    |
| quercetin | SMURF1   |
| quercetin | SMURF2   |
| quercetin | TRIM11   |
| quercetin | TRIM21   |
| quercetin | TRIM22   |
| quercetin | ZFYVE19  |
| quercetin | TRIM4    |
| quercetin | UBR4     |
| quercetin | AIM1     |
| quercetin | XIAP     |
| quercetin | ZNRF3    |
| quercetin | EGR1     |
| quercetin | EGR3     |
| quercetin | EGR4     |
| quercetin | EML2     |
| quercetin | ART4     |
| quercetin | ENTPD5   |
| quercetin | ENPP1    |
| quercetin | ENPP2    |
| quercetin | ENPP3    |
| quercetin | KATNBL1  |
| quercetin | EFCAB7   |
| quercetin | EOGT     |
| quercetin | EFEMP1   |
| quercetin | EMR2     |
| quercetin | EGLN1    |
| quercetin | EHBP1    |
| quercetin | ETFB     |
| quercetin | EAF2     |
| quercetin | ELMOD2   |
| quercetin | EEF1A1   |
| quercetin | GFM1     |
| quercetin | TSFM     |
| quercetin | TUFM     |
| quercetin | ELOVL1   |
| quercetin | ELOVL3   |
| quercetin | ELOVL6   |
| quercetin | IKBKAP   |
| quercetin | TMEM126B |
| quercetin | ENDOD1   |
| quercetin | ACAT2    |
| quercetin | HSPA5    |
| quercetin | ACAT1    |
| quercetin | ERP27    |
| quercetin | ERP29    |
| quercetin | EVA1A    |
| quercetin | ERGIC2   |
| quercetin | HSP90B1  |
| quercetin | ESAM     |
| quercetin | ACACA    |

[illegible]



|           |         |
|-----------|---------|
| quercetin | EIF3F   |
| quercetin | EIF4E2  |
| quercetin | EIF6    |
| quercetin | SLC1A2  |
| quercetin | EXOC2   |
| quercetin | EXOC4   |
| quercetin | EXOC6   |
| quercetin | EXOSC8  |
| quercetin | EXOSC9  |
| quercetin | EXTL2   |
| quercetin | SLC5A9  |
| quercetin | XPOT    |
| quercetin | SULF2   |
| quercetin | FLAD1   |
| quercetin | FANCB   |
| quercetin | FANCG   |
| quercetin | FAN1    |
| quercetin | FDPS    |
| quercetin | FAIM    |
| quercetin | FEZ2    |
| quercetin | FASTKD1 |
| quercetin | FASTKD2 |
| quercetin | FITM1   |
| quercetin | ACTB    |
| quercetin | FADS3   |
| quercetin | FASN    |
| quercetin | FABP1   |
| quercetin | ALDH3A2 |
| quercetin | FBXO10  |
| quercetin | FBXO2   |
| quercetin | FBXO25  |
| quercetin | FBXO28  |
| quercetin | FBXO3   |
| quercetin | FBXO41  |
| quercetin | FBXO5   |
| quercetin | ACTA1   |
| quercetin | FBXL2   |
| quercetin | PDP2    |
| quercetin | FBXL6   |
| quercetin | ACTA2   |
| quercetin | FCHSD2  |
| quercetin | FLVCR2  |
| quercetin | FRMD3   |
| quercetin | FRMD4B  |
| quercetin | FRMD5   |
| quercetin | ACTB    |
| quercetin | FARP1   |
| quercetin | FARP2   |
| quercetin | FERMT1  |
| quercetin | FERMT2  |
| quercetin | FGA     |
| quercetin | FGB     |
| quercetin | FGG     |
| quercetin | FGF18   |
| quercetin | ABLIM3  |
| quercetin | FGF7    |
| quercetin | FGFR1   |
| quercetin | FGFR2   |
| quercetin | FGFR3   |

|           |          |
|-----------|----------|
| quercetin | FGFR4    |
| quercetin | FGFRL1   |
| quercetin | ANLN     |
| quercetin | FGFBP3   |
| quercetin | FGL2     |
| quercetin | FN1      |
| quercetin | COBLL1   |
| quercetin | FNDC3B   |
| quercetin | FBLN2    |
| quercetin | FIGN     |
| quercetin | FIGNL1   |
| quercetin | FILIP1L  |
| quercetin | FLNA     |
| quercetin | FLNB     |
| quercetin | PTK2     |
| quercetin | FLCN     |
| quercetin | FNIP2    |
| quercetin | FSTL3    |
| quercetin | FOXM1    |
| quercetin | FOXN3    |
| quercetin | FOXP1    |
| quercetin | FTCD     |
| quercetin | FNBP1L   |
| quercetin | FOSL1    |
| quercetin | CX3CL1   |
| quercetin | FMR1     |
| quercetin | FZD7     |
| quercetin | FBP1     |
| quercetin | TIGAR    |
| quercetin | ALDOA    |
| quercetin | ALDOC    |
| quercetin | FH       |
| quercetin | FAH      |
| quercetin | FXYD5    |
| quercetin | GPANK1   |
| quercetin | MICB     |
| quercetin | CCND1    |
| quercetin | ACTR6    |
| quercetin | CCND2    |
| quercetin | CCND3    |
| quercetin | CCNE1    |
| quercetin | CCNE2    |
| quercetin | G2E3     |
| quercetin | CCNB1    |
| quercetin | CCNB2    |
| quercetin | GABPB2   |
| quercetin | GAL3ST1  |
| quercetin | B3GAT3   |
| quercetin | GALR2    |
| quercetin | LGALS1   |
| quercetin | LGALS2   |
| quercetin | LGALS3   |
| quercetin | LGALS3BP |
| quercetin | LGALS8   |
| quercetin | ADD3     |
| quercetin | SUB1     |
| quercetin | GABRE    |
| quercetin | ASCC3    |
| quercetin | IFI30    |

|           |          |
|-----------|----------|
| quercetin | TUBGCP3  |
| quercetin | TUBGCP6  |
| quercetin | GJA1     |
| quercetin | GJB1     |
| quercetin | GAS2L3   |
| quercetin | GSDMB    |
| quercetin | PGC      |
| quercetin | GCFC2    |
| quercetin | ATF7IP   |
| quercetin | TSTA3    |
| quercetin | GMDS     |
| quercetin | GSN      |
| quercetin | GEMIN2   |
| quercetin | GEMIN6   |
| quercetin | AHSA1    |
| quercetin | GSE1     |
| quercetin | GHDC     |
| quercetin | CCDC88A  |
| quercetin | SERPINE2 |
| quercetin | GLIPR1   |
| quercetin | GLMN     |
| quercetin | NR3C1    |
| quercetin | GLCCI1   |
| quercetin | PGM2L1   |
| quercetin | G6PC     |
| quercetin | G6PD     |
| quercetin | GPI      |
| quercetin | GFOD1    |
| quercetin | GAD1     |
| quercetin | GLUD1    |
| quercetin | GLUD2    |
| quercetin | GCLC     |
| quercetin | GCLM     |
| quercetin | GLS      |
| quercetin | GLS2     |
| quercetin | PDE12    |
| quercetin | QRICH2   |
| quercetin | QPCT     |
| quercetin | ADNP     |
| quercetin | GLRX2    |
| quercetin | GPX1     |
| quercetin | GPX2     |
| quercetin | GSR      |
| quercetin | GSTA1    |
| quercetin | GSTA4    |
| quercetin | GSTK1    |
| quercetin | GSTM1    |
| quercetin | GSTM2    |
| quercetin | GSTM4    |
| quercetin | GSTP1    |
| quercetin | GPAM     |
| quercetin | AGPAT9   |
| quercetin | GPD1L    |
| quercetin | GDPD5    |
| quercetin | GATM     |
| quercetin | GLDC     |
| quercetin | GNMT     |
| quercetin | ACAD11   |
| quercetin | GLRA1    |

|           |          |
|-----------|----------|
| quercetin | PAEP     |
| quercetin | GYS1     |
| quercetin | AGL      |
| quercetin | PYGB     |
| quercetin | PYGL     |
| quercetin | PYGM     |
| quercetin | GSK3A    |
| quercetin | GSK3B    |
| quercetin | GYG2     |
| quercetin | GLTPD2   |
| quercetin | ARSA     |
| quercetin | ACSF2    |
| quercetin | MANEA    |
| quercetin | GPHA2    |
| quercetin | C1GALT1  |
| quercetin | GPAA1    |
| quercetin | GLT8D1   |
| quercetin | NMT2     |
| quercetin | GPC1     |
| quercetin | GPC6     |
| quercetin | GOLGA8A  |
| quercetin | GBF1     |
| quercetin | PIGN     |
| quercetin | PGAP1    |
| quercetin | PIGZ     |
| quercetin | GPN1     |
| quercetin | ACSS3    |
| quercetin | GPR35    |
| quercetin | GPSM2    |
| quercetin | GCA      |
| quercetin | LPGAT1   |
| quercetin | CSF3R    |
| quercetin | CSF2     |
| quercetin | GAREM1   |
| quercetin | ACBD6    |
| quercetin | PLA2G12B |
| quercetin | PLA2G16  |
| quercetin | GADD45A  |
| quercetin | GADD45B  |
| quercetin | GAS2     |
| quercetin | GRB10    |
| quercetin | GRB14    |
| quercetin | DBI      |
| quercetin | GDF11    |
| quercetin | GDF15    |
| quercetin | GRPEL1   |
| quercetin | FRAT2    |
| quercetin | HRAS     |
| quercetin | KRAS     |
| quercetin | NRAS     |
| quercetin | GTPBP8   |
| quercetin | GEM      |
| quercetin | RRAD     |
| quercetin | RIT2     |
| quercetin | GDA      |
| quercetin | GNAI1    |
| quercetin | ACSM3    |
| quercetin | GNG4     |
| quercetin | ACSM5    |

|           |           |
|-----------|-----------|
| quercetin | GNA13     |
| quercetin | GNA15     |
| quercetin | RACK1     |
| quercetin | GUCA1B    |
| quercetin | CLCN3     |
| quercetin | CLCN5     |
| quercetin | PDK1      |
| quercetin | DECR1     |
| quercetin | TSC1      |
| quercetin | HP        |
| quercetin | ACOT13    |
| quercetin | HAUS1     |
| quercetin | HAUS3     |
| quercetin | PHF14     |
| quercetin | HS1BP3    |
| quercetin | HEATR1    |
| quercetin | HEATR3    |
| quercetin | HSPA12A   |
| quercetin | HSPA14    |
| quercetin | HSPA1B    |
| quercetin | HSPA4     |
| quercetin | HSPA4L    |
| quercetin | HSPA2     |
| quercetin | HSF1      |
| quercetin | HSPH1     |
| quercetin | HSPB1     |
| quercetin | HSP90AA1  |
| quercetin | HSPA2     |
| quercetin | HLTF      |
| quercetin | HCLS1     |
| quercetin | HPGDS     |
| quercetin | HHEX      |
| quercetin | HMOX1     |
| quercetin | ACYP1     |
| quercetin | HBG2      |
| quercetin | HS2ST1    |
| quercetin | SERPIND1  |
| quercetin | HLF       |
| quercetin | LIPC      |
| quercetin | MET       |
| quercetin | HGS       |
| quercetin | FOXA1     |
| quercetin | FOXA3     |
| quercetin | HNF4G     |
| quercetin | HAMP      |
| quercetin | ADAMTSL4  |
| quercetin | HHLA3     |
| quercetin | HNRNPA0   |
| quercetin | HNRNPD    |
| quercetin | HNRNPH1   |
| quercetin | HNRNPH3   |
| quercetin | HNRNPA2B1 |
| quercetin | COQ3      |
| quercetin | SLC51B    |
| quercetin | HK2       |
| quercetin | FCER1G    |
| quercetin | HMGN3     |
| quercetin | MRGPRX3   |
| quercetin | HMGB1     |



|           |           |
|-----------|-----------|
| quercetin | HMGB2     |
| quercetin | HMGA1     |
| quercetin | APC       |
| quercetin | ESR1      |
| quercetin | HNMT      |
| quercetin | HAL       |
| quercetin | HDC       |
| quercetin | HINT3     |
| quercetin | KAT2B     |
| quercetin | ADA       |
| quercetin | ASF1B     |
| quercetin | SAP30L    |
| quercetin | HIST1H1C  |
| quercetin | H1FX      |
| quercetin | HIST1H2AB |
| quercetin | HIST1H2AC |
| quercetin | HIST1H2BD |
| quercetin | RNASEL    |
| quercetin | ZNF468    |
| quercetin | HIST1H3A  |
| quercetin | CENPA     |
| quercetin | HIST1H4A  |
| quercetin | PHF8      |
| quercetin | SETDB2    |
| quercetin | SETMAR    |
| quercetin | CD74      |
| quercetin | HLA-DMA   |
| quercetin | HBP1      |
| quercetin | DLX2      |
| quercetin | DLX6      |
| quercetin | ADORA2A   |
| quercetin | HOXA3     |
| quercetin | HOXA4     |
| quercetin | HOXA5     |
| quercetin | HOXD1     |
| quercetin | MEIS1     |
| quercetin | MEIS2     |
| quercetin | MIXL1     |
| quercetin | MSX1      |
| quercetin | NKX3-1    |
| quercetin | TGIF2     |
| quercetin | HERPUD1   |
| quercetin | PSMC3IP   |
| quercetin | HUNK      |
| quercetin | HCFC1R1   |
| quercetin | CDC37     |
| quercetin | HSP90AA1  |
| quercetin | HMMR      |
| quercetin | HAS1      |
| quercetin | HAS2      |
| quercetin | HAS3      |
| quercetin | HYLS1     |
| quercetin | HMGCL     |
| quercetin | HMGCS1    |
| quercetin | HIF1A     |
| quercetin | HILPDA    |
| quercetin | IER2      |
| quercetin | IER5      |
| quercetin | IER5L     |

|           |          |
|-----------|----------|
| quercetin | IGDCC3   |
| quercetin | IGDCC4   |
| quercetin | IGSF1    |
| quercetin | KPNA3    |
| quercetin | KPNA4    |
| quercetin | IPO8     |
| quercetin | ARL15    |
| quercetin | RHBDF2   |
| quercetin | PTK7     |
| quercetin | CYP27B1  |
| quercetin | IDO1     |
| quercetin | MCL1     |
| quercetin | IVNS1ABP |
| quercetin | INHBB    |
| quercetin | INHBE    |
| quercetin | CHUK     |
| quercetin | IKBIP    |
| quercetin | INO80B   |
| quercetin | MALSU1   |
| quercetin | PPA2     |
| quercetin | ITPR1    |
| quercetin | ITPR2    |
| quercetin | ITPR3    |
| quercetin | ITPRIP   |
| quercetin | ITPRIPL1 |
| quercetin | IP6K2    |
| quercetin | IMPA2    |
| quercetin | ISYNA1   |
| quercetin | ITPKA    |
| quercetin | INSR     |
| quercetin | IRS1     |
| quercetin | INSRR    |
| quercetin | IGF1R    |
| quercetin | IGF2BP3  |
| quercetin | IGF2     |
| quercetin | IGFBP1   |
| quercetin | IGFBP2   |
| quercetin | IGFBP3   |
| quercetin | OAS3     |
| quercetin | ADSSL1   |
| quercetin | IGFBP4   |
| quercetin | INTS8    |
| quercetin | ITGA10   |
| quercetin | ITGA2    |
| quercetin | ITGA6    |
| quercetin | ITGAV    |
| quercetin | ITIH1    |
| quercetin | ICAM1    |
| quercetin | ICAM3    |
| quercetin | ICAM4    |
| quercetin | IFNAR1   |
| quercetin | IFI6     |
| quercetin | IFNG     |
| quercetin | IFNGR2   |
| quercetin | IRF1     |
| quercetin | IRF2BPL  |
| quercetin | IRF3     |
| quercetin | IFIH1    |
| quercetin | IFIT1    |

|           |          |
|-----------|----------|
| quercetin | IFIT5    |
| quercetin | IL1A     |
| quercetin | IL1B     |
| quercetin | IL1R2    |
| quercetin | IRAK1    |
| quercetin | IRAK1BP1 |
| quercetin | IRAK3    |
| quercetin | IRAK2    |
| quercetin | IL1RL1   |
| quercetin | IL10     |
| quercetin | IL11     |
| quercetin | IL15     |
| quercetin | IL17RB   |
| quercetin | IL17A    |
| quercetin | ADIPOQ   |
| quercetin | IL2      |
| quercetin | IL20RB   |
| quercetin | IL22RA1  |
| quercetin | IL32     |
| quercetin | IL4      |
| quercetin | IL4R     |
| quercetin | IL6      |
| quercetin | IL6ST    |
| quercetin | IL7      |
| quercetin | CXCL8    |
| quercetin | ITSN1    |
| quercetin | MMP1     |
| quercetin | ADM      |
| quercetin | ISX      |
| quercetin | IFT172   |
| quercetin | IFT80    |
| quercetin | IQCF1    |
| quercetin | TCF7L2   |
| quercetin | NUBPL    |
| quercetin | IRX3     |
| quercetin | ISOC1    |
| quercetin | PDK2     |
| quercetin | IDH1     |
| quercetin | IARS     |
| quercetin | IDI1     |
| quercetin | ISM2     |
| quercetin | JAK1     |
| quercetin | PGBD3    |
| quercetin | JDP2     |
| quercetin | JMY      |
| quercetin | KLK2     |
| quercetin | NUDT9    |
| quercetin | SERPINA4 |
| quercetin | KATNAL1  |
| quercetin | KAZN     |
| quercetin | KDELC1   |
| quercetin | KLHDC2   |
| quercetin | ZNF75A   |
| quercetin | CD38     |
| quercetin | SLC51A   |
| quercetin | KBTBD6   |
| quercetin | KBTBD7   |
| quercetin | KEAP1    |
| quercetin | KLHL14   |

|           |          |
|-----------|----------|
| quercetin | KLHL2    |
| quercetin | KLHL21   |
| quercetin | SELENOO  |
| quercetin | EFNA4    |
| quercetin | KLHL9    |
| quercetin | KRT15    |
| quercetin | KRT19    |
| quercetin | KRT20    |
| quercetin | KRT23    |
| quercetin | KRT1     |
| quercetin | ARF3     |
| quercetin | FAM222A  |
| quercetin | FAM135A  |
| quercetin | PRODH2   |
| quercetin | SLC25A30 |
| quercetin | KLC4     |
| quercetin | KIFAP3   |
| quercetin | KIF11    |
| quercetin | KIF14    |
| quercetin | KIF15    |
| quercetin | KIF16B   |
| quercetin | KIF18A   |
| quercetin | KIF20A   |
| quercetin | KIF20B   |
| quercetin | KIF21A   |
| quercetin | KIF23    |
| quercetin | KIF2A    |
| quercetin | KIF3A    |
| quercetin | KIFC2    |
| quercetin | NDC80    |
| quercetin | NUF2     |
| quercetin | NADK2    |
| quercetin | SPC25    |
| quercetin | KNG1     |
| quercetin | KANK1    |
| quercetin | KANK4    |
| quercetin | KRIT1    |
| quercetin | KLF3     |
| quercetin | KLF4     |
| quercetin | ARL13B   |
| quercetin | KLF5     |
| quercetin | KLF6     |
| quercetin | HKR1     |
| quercetin | AADAT    |
| quercetin | CCBL2    |
| quercetin | LCT      |
| quercetin | GLO1     |
| quercetin | LAD1     |
| quercetin | CRYL1    |
| quercetin | LBR      |
| quercetin | LMNB1    |
| quercetin | LSS      |
| quercetin | LARP6    |
| quercetin | SLC7A5   |
| quercetin | DBR1     |
| quercetin | ASRGL1   |
| quercetin | ARL4D    |
| quercetin | YAE1D1   |
| quercetin | LGSN     |

|           |          |
|-----------|----------|
| quercetin | LIM2     |
| quercetin | LEPR     |
| quercetin | ARL6     |
| quercetin | LETM2    |
| quercetin | LRG1     |
| quercetin | LRCH1    |
| quercetin | LRRIQ3   |
| quercetin | FLRT3    |
| quercetin | LGR4     |
| quercetin | LGR5     |
| quercetin | FAM83D   |
| quercetin | LRRC37A3 |
| quercetin | RRNAD1   |
| quercetin | COX20    |
| quercetin | LRRC8D   |
| quercetin | C10orf11 |
| quercetin | LRIG1    |
| quercetin | LRIG3    |
| quercetin | SMIM20   |
| quercetin | LZTR1    |
| quercetin | LNPEP    |
| quercetin | LIF      |
| quercetin | LIFR     |
| quercetin | LNP1     |
| quercetin | SERPINB1 |
| quercetin | LENG8    |
| quercetin | LAIR2    |
| quercetin | LTB4R    |
| quercetin | CYP4F2   |
| quercetin | CYP4F3   |
| quercetin | LPXN     |
| quercetin | LNX2     |
| quercetin | LMCD1    |
| quercetin | LIMA1    |
| quercetin | LIMK1    |
| quercetin | LIMK2    |
| quercetin | LIPH     |
| quercetin | LCN15    |
| quercetin | LSR      |
| quercetin | PPFIBP2  |
| quercetin | C16orf5  |
| quercetin | LEAP2    |
| quercetin | LONRF1   |
| quercetin | ACSL5    |
| quercetin | ACSL6    |
| quercetin | FCGR2B   |
| quercetin | LDLR     |
| quercetin | LRP10    |
| quercetin | LAS2     |
| quercetin | LY96     |
| quercetin | PBK      |
| quercetin | KRCC1    |
| quercetin | KDM3A    |
| quercetin | KDM1A    |
| quercetin | KDM1B    |
| quercetin | LYSMD2   |
| quercetin | LPAR6    |
| quercetin | LYPLAL1  |
| quercetin | TMEM86B  |

|           |          |
|-----------|----------|
| quercetin | LIPA     |
| quercetin | GAA      |
| quercetin | AGMAT    |
| quercetin | LAPTM5   |
| quercetin | LYZ      |
| quercetin | DCPS     |
| quercetin | CSF1R    |
| quercetin | MIF      |
| quercetin | MPP5     |
| quercetin | MPP6     |
| quercetin | MPP7     |
| quercetin | MFSD10   |
| quercetin | MFSD8    |
| quercetin | MR1      |
| quercetin | MVP      |
| quercetin | MFHAS1   |
| quercetin | AKAP12   |
| quercetin | MGAM     |
| quercetin | C17orf48 |
| quercetin | GMPPB    |
| quercetin | MAN1A1   |
| quercetin | MAN1A2   |
| quercetin | MANSC1   |
| quercetin | MKNK2    |
| quercetin | MBIP     |
| quercetin | MAP7D1   |
| quercetin | KIT      |
| quercetin | MELK     |
| quercetin | MMP7     |
| quercetin | AKIRIN1  |
| quercetin | MMP9     |
| quercetin | AKIRIN2  |
| quercetin | MXD1     |
| quercetin | DTD2     |
| quercetin | MXI1     |
| quercetin | TMEM67   |
| quercetin | MED10    |
| quercetin | MED21    |
| quercetin | MED26    |
| quercetin | MED30    |
| quercetin | MED7     |
| quercetin | MNS1     |
| quercetin | MIA2     |
| quercetin | GPT2     |
| quercetin | MAGED1   |
| quercetin | MLPH     |
| quercetin | CD46     |
| quercetin | AOC3     |
| quercetin | PAQR8    |
| quercetin | PAQR5    |
| quercetin | FAM174A  |
| quercetin | MAGI2    |
| quercetin | MAGI3    |
| quercetin | PITPNM1  |
| quercetin | PKMYT1   |
| quercetin | TMEM50B  |
| quercetin | MBLAC2   |
| quercetin | OMA1     |
| quercetin | TIMP1    |

|           |          |
|-----------|----------|
| quercetin | TIMP2    |
| quercetin | PDK3     |
| quercetin | PSMD2    |
| quercetin | STEAP1   |
| quercetin | STEAP2   |
| quercetin | MT1G     |
| quercetin | MT1M     |
| quercetin | MT2A     |
| quercetin | MTSS1    |
| quercetin | ALB      |
| quercetin | MTA1     |
| quercetin | METRNL   |
| quercetin | AKR1A1   |
| quercetin | MTR      |
| quercetin | MARS2    |
| quercetin | MBD4     |
| quercetin | MBD6     |
| quercetin | TET1     |
| quercetin | ADH4     |
| quercetin | AUH      |
| quercetin | ALDH6A1  |
| quercetin | MSMO1    |
| quercetin | RFPL3S   |
| quercetin | MRI1     |
| quercetin | CHCHD10  |
| quercetin | METTL5   |
| quercetin | METTL7A  |
| quercetin | METTL7B  |
| quercetin | MICALL1  |
| quercetin | MICALL2  |
| quercetin | ADH5     |
| quercetin | MITF     |
| quercetin | DGCR8    |
| quercetin | PSMD3    |
| quercetin | MGST2    |
| quercetin | MTTP     |
| quercetin | MAP1B    |
| quercetin | MAP1LC3B |
| quercetin | MTUS1    |
| quercetin | MDK      |
| quercetin | MIDN     |
| quercetin | HMHA1    |
| quercetin | MIPOL1   |
| quercetin | MITD1    |
| quercetin | SPATA18  |
| quercetin | SLC25A21 |
| quercetin | MARC1    |
| quercetin | SLC25A20 |
| quercetin | ENOSF1   |
| quercetin | MTFR1    |
| quercetin | TIMM8A   |
| quercetin | TOMM22   |
| quercetin | XRCC6BP1 |
| quercetin | IMMP1L   |
| quercetin | ALDH1B1  |
| quercetin | IMMT     |
| quercetin | RHOT1    |
| quercetin | TRMU     |
| quercetin | UCP2     |

|           |         |
|-----------|---------|
| quercetin | MAPK1   |
| quercetin | ALDH2   |
| quercetin | MAPK11  |
| quercetin | MAPK12  |
| quercetin | MAPK13  |
| quercetin | MAPK14  |
| quercetin | MAPK15  |
| quercetin | MAPK3   |
| quercetin | MAPK4   |
| quercetin | MAPK6   |
| quercetin | MAPK7   |
| quercetin | MAPK8   |
| quercetin | MAP3K10 |
| quercetin | MAP3K11 |
| quercetin | MAP3K12 |
| quercetin | MAP3K13 |
| quercetin | MAP3K4  |
| quercetin | AOX1    |
| quercetin | MAP3K7  |
| quercetin | MAP3K8  |
| quercetin | MAP3K9  |
| quercetin | MAP4K1  |
| quercetin | MAP4K4  |
| quercetin | BUB3    |
| quercetin | BUB1    |
| quercetin | BUB1B   |
| quercetin | MAD1L1  |
| quercetin | MAD2L1  |
| quercetin | MLKL    |
| quercetin | MOB1B   |
| quercetin | AKR1B10 |
| quercetin | MOCOS   |
| quercetin | MOCS2   |
| quercetin | ABHD6   |
| quercetin | SLC16A1 |
| quercetin | AKR1B15 |
| quercetin | SLC16A7 |
| quercetin | SLC16A3 |
| quercetin | AKR1C1  |
| quercetin | SLC16A4 |
| quercetin | SLC16A6 |
| quercetin | MORC4   |
| quercetin | MORN2   |
| quercetin | KLHL5   |
| quercetin | SMAD5   |
| quercetin | SMAD7   |
| quercetin | AKR1C2  |
| quercetin | CDC25C  |
| quercetin | AKR1C3  |
| quercetin | DCP1B   |
| quercetin | MTERFD1 |
| quercetin | MCOLN1  |
| quercetin | AKR1C4  |
| quercetin | MALT1   |
| quercetin | ABCG2   |
| quercetin | ABCB1   |
| quercetin | ABCB4   |
| quercetin | ABCC1   |
| quercetin | ABCC4   |



|           |          |
|-----------|----------|
| quercetin | ABCC6    |
| quercetin | MEGF6    |
| quercetin | PSMD5    |
| quercetin | GALM     |
| quercetin | MEGF8    |
| quercetin | MPDZ     |
| quercetin | AKR1B1   |
| quercetin | MUSK     |
| quercetin | MBNL2    |
| quercetin | MBNL3    |
| quercetin | CYP1B1   |
| quercetin | MSH5     |
| quercetin | MSANTD1  |
| quercetin | MSANTD3  |
| quercetin | MYBL1    |
| quercetin | MYC      |
| quercetin | MPZ      |
| quercetin | MPO      |
| quercetin | MYOF     |
| quercetin | MYL5     |
| quercetin | MYLK     |
| quercetin | MYL12A   |
| quercetin | MYL9     |
| quercetin | DMPK     |
| quercetin | MTMR4    |
| quercetin | SLC9A3R1 |
| quercetin | RIMKLA   |
| quercetin | NAALAD2  |
| quercetin | GNPTAB   |
| quercetin | NAGS     |
| quercetin | GCNT2    |
| quercetin | NAT14    |
| quercetin | NAT6     |
| quercetin | NAT9     |
| quercetin | NAPEPLD  |
| quercetin | NQO1     |
| quercetin | NQO2     |
| quercetin | RETSAT   |
| quercetin | ME2      |
| quercetin | SIRT1    |
| quercetin | SIRT2    |
| quercetin | SIRT3    |
| quercetin | SIRT4    |
| quercetin | SIRT6    |
| quercetin | SIRT7    |
| quercetin | NDUFA3   |
| quercetin | NDUFA4   |
| quercetin | NDUFS1   |
| quercetin | NOX1     |
| quercetin | NOX3     |
| quercetin | FUT9     |
| quercetin | NOX4     |
| quercetin | NOX5     |
| quercetin | POR      |
| quercetin | NAA15    |
| quercetin | NELF     |
| quercetin | SLC11A2  |
| quercetin | NCKAP1   |
| quercetin | NCKIPSD  |

|           |          |
|-----------|----------|
| quercetin | LBH      |
| quercetin | NEB      |
| quercetin | NDFIP2   |
| quercetin | N4BP2L1  |
| quercetin | N4BP2L2  |
| quercetin | NEDD8    |
| quercetin | UBA3     |
| quercetin | FUT11    |
| quercetin | RDBP     |
| quercetin | FUT8     |
| quercetin | NTN4     |
| quercetin | PPP1R9A  |
| quercetin | NBEA     |
| quercetin | SCG5     |
| quercetin | NET1     |
| quercetin | NEFM     |
| quercetin | NMB      |
| quercetin | NAV2     |
| quercetin | CHRNA10  |
| quercetin | NREP     |
| quercetin | NPY1R    |
| quercetin | NETO2    |
| quercetin | SERPINI1 |
| quercetin | ORM1     |
| quercetin | NCF1     |
| quercetin | NCF2     |
| quercetin | NEXN     |
| quercetin | ORM2     |
| quercetin | NFKBIA   |
| quercetin | NKIRAS1  |
| quercetin | NKIRAS2  |
| quercetin | FPR2     |
| quercetin | OGG1     |
| quercetin | NBN      |
| quercetin | NAMPT    |
| quercetin | A1BG     |
| quercetin | NPC1L1   |
| quercetin | NIF3L1   |
| quercetin | NIN      |
| quercetin | NINJ2    |
| quercetin | NOS1     |
| quercetin | NOS3     |
| quercetin | NOS2     |
| quercetin | SETD6    |
| quercetin | NMI      |
| quercetin | TYK2     |
| quercetin | DFNA5    |
| quercetin | NMES1    |
| quercetin | PDK4     |
| quercetin | NLE1     |
| quercetin | NUAK1    |
| quercetin | NFE2L2   |
| quercetin | NFE2L3   |
| quercetin | NFIL3    |
| quercetin | NFKB2    |
| quercetin | SERPINF2 |
| quercetin | NUP85    |
| quercetin | ADAL     |
| quercetin | NUP210   |

|           |         |
|-----------|---------|
| quercetin | NUPR1   |
| quercetin | MDM1    |
| quercetin | MPC1    |
| quercetin | NCOA1   |
| quercetin | NCOA2   |
| quercetin | AHSG    |
| quercetin | NR0B2   |
| quercetin | NR1I2   |
| quercetin | NR1I3   |
| quercetin | NR1I2   |
| quercetin | NR4A1   |
| quercetin | NSRP1   |
| quercetin | NUSAP1  |
| quercetin | TIA1    |
| quercetin | NUP35   |
| quercetin | CDC27   |
| quercetin | NUP62CL |
| quercetin | ZNF211  |
| quercetin | NME7    |
| quercetin | NME4    |
| quercetin | NAP1L5  |
| quercetin | BPTF    |
| quercetin | AASS    |
| quercetin | NACC2   |
| quercetin | NUDCD2  |
| quercetin | MACROD1 |
| quercetin | ODAM    |
| quercetin | OLFML1  |
| quercetin | OLFML3  |
| quercetin | PPP1R21 |
| quercetin | CEP89   |
| quercetin | SYNE4   |
| quercetin | OMG     |
| quercetin | NIT2    |
| quercetin | SEPSECS |
| quercetin | OGFRL1  |
| quercetin | ACTR1A  |
| quercetin | KBTBD3  |
| quercetin | KBTBD4  |
| quercetin | ORC1    |
| quercetin | ORC2    |
| quercetin | ORC6    |
| quercetin | ORMDL2  |
| quercetin | ODC1    |
| quercetin | NR1I2   |
| quercetin | BGLAP   |
| quercetin | OSTF1   |
| quercetin | OSTM1   |
| quercetin | SPP1    |
| quercetin | OAF     |
| quercetin | AK4     |
| quercetin | OXR1    |
| quercetin | ENO1    |
| quercetin | OSGIN2  |
| quercetin | OXNAD1  |
| quercetin | OSBPL10 |
| quercetin | OSBPL11 |
| quercetin | OSBPL3  |
| quercetin | OSBPL8  |

|           |          |
|-----------|----------|
| quercetin | GLA      |
| quercetin | OXTR     |
| quercetin | P2RY2    |
| quercetin | PERP     |
| quercetin | PAN2     |
| quercetin | SIN3A    |
| quercetin | PAX8     |
| quercetin | PALLD    |
| quercetin | PALMD    |
| quercetin | ZDHHC2   |
| quercetin | ZDHHC21  |
| quercetin | PDX1     |
| quercetin | SPINK1   |
| quercetin | VNN1     |
| quercetin | PANK1    |
| quercetin | PANK2    |
| quercetin | NR1I2    |
| quercetin | CDC73    |
| quercetin | PNMA1    |
| quercetin | PTHLH    |
| quercetin | WIBG     |
| quercetin | PASK     |
| quercetin | PNPLA3   |
| quercetin | PSIP1    |
| quercetin | MAN2C1   |
| quercetin | PDLIM7   |
| quercetin | GIPC1    |
| quercetin | GIPC2    |
| quercetin | PCNXL3   |
| quercetin | NGLY1    |
| quercetin | PPIA     |
| quercetin | PPID     |
| quercetin | FKBP10   |
| quercetin | FKBP8    |
| quercetin | PIN1     |
| quercetin | PPIL4    |
| quercetin | PPWD1    |
| quercetin | PWP1     |
| quercetin | PWP2     |
| quercetin | PMP22    |
| quercetin | NAGLU    |
| quercetin | PRDX2    |
| quercetin | PRDX4    |
| quercetin | PRDX5    |
| quercetin | ACOX2    |
| quercetin | ACOX3    |
| quercetin | EHHADH   |
| quercetin | PEX3     |
| quercetin | PEX13    |
| quercetin | HSD17B4  |
| quercetin | PIPOX    |
| quercetin | PECR     |
| quercetin | PEX6     |
| quercetin | PEX2     |
| quercetin | ALPK2    |
| quercetin | PPARA    |
| quercetin | PPARD    |
| quercetin | PPARG    |
| quercetin | PPARGC1A |

|           |          |
|-----------|----------|
| quercetin | ABCB1    |
| quercetin | PSD3     |
| quercetin | PSD4     |
| quercetin | PHF10    |
| quercetin | PAH      |
| quercetin | PMAIP1   |
| quercetin | PHACTR2  |
| quercetin | MROH1    |
| quercetin | TXLNA    |
| quercetin | CDS1     |
| quercetin | PEBP1    |
| quercetin | PTPMT1   |
| quercetin | PTEN     |
| quercetin | PIK3C3   |
| quercetin | PIK3CA   |
| quercetin | PIK3CB   |
| quercetin | PIK3CD   |
| quercetin | PIK3CG   |
| quercetin | PIK3C2A  |
| quercetin | PIK3C2B  |
| quercetin | PIK3C2G  |
| quercetin | PIP5K1B  |
| quercetin | ALMS1    |
| quercetin | PCK1     |
| quercetin | PGM1     |
| quercetin | PGM2     |
| quercetin | PGK1     |
| quercetin | PGAM1    |
| quercetin | PIK3AP1  |
| quercetin | PIK3CG   |
| quercetin | PLA2G1B  |
| quercetin | PLA2G2A  |
| quercetin | PLD1     |
| quercetin | PLD3     |
| quercetin | PLSCR1   |
| quercetin | PLSCR4   |
| quercetin | PLTP     |
| quercetin | PPCDC    |
| quercetin | PHKA2    |
| quercetin | PHKB     |
| quercetin | AHR      |
| quercetin | PSAT1    |
| quercetin | PSPH     |
| quercetin | PPP1R18  |
| quercetin | PHYHD1   |
| quercetin | PHYHIPL  |
| quercetin | PGBD1    |
| quercetin | SERPINF1 |
| quercetin | PIR      |
| quercetin | PITHD1   |
| quercetin | PITX2    |
| quercetin | PLAC8L1  |
| quercetin | PKP2     |
| quercetin | PKP4     |
| quercetin | SERPINE1 |
| quercetin | SERPINB2 |
| quercetin | PLS1     |
| quercetin | PEAR1    |
| quercetin | PAFAH1B1 |

|           |               |
|-----------|---------------|
| quercetin | PDGFC         |
| quercetin | PDGFRA        |
| quercetin | PDGFRB        |
| quercetin | PDGFRL        |
| quercetin | PLEKHA2       |
| quercetin | PLEKHA6       |
| quercetin | ESR1          |
| quercetin | PLEKHH1       |
| quercetin | PLEKHM1       |
| quercetin | PLEKHO1       |
| quercetin | PHLDA1        |
| quercetin | PHLDA2        |
| quercetin | PHLDA3        |
| quercetin | PHLDB2        |
| quercetin | DKFZp686L2375 |
| quercetin | PLXNA3        |
| quercetin | PLXNB2        |
| quercetin | PLXNC1        |
| quercetin | PVRL4         |
| quercetin | PARP1         |
| quercetin | PARP12        |
| quercetin | PABPC1L       |
| apigenin  | POU5F1        |
| apigenin  | MAOA          |
| apigenin  | MAOB          |
| apigenin  | EGF           |
| apigenin  | POMC          |
| apigenin  | PTGS2         |
| apigenin  | PSCA          |
| apigenin  | PSME3         |
| apigenin  | RUNX1T1       |
| apigenin  | FOS           |
| apigenin  | SRC           |
| apigenin  | TP53I3        |
| apigenin  | AKT1          |
| apigenin  | FLT3          |
| apigenin  | RB1           |
| apigenin  | RPS6KB1       |
| apigenin  | SLC5A5        |
| apigenin  | FXYP2         |
| apigenin  | SLC2A1        |
| apigenin  | SLC2A4        |
| apigenin  | BAX           |
| apigenin  | BCL2          |
| apigenin  | CXCL12        |
| apigenin  | C11orf80      |
| apigenin  | VEGFA         |
| apigenin  | GYPA          |
| apigenin  | SOCS3         |
| apigenin  | TNKS2         |
| apigenin  | JUN           |
| apigenin  | RELA          |
| apigenin  | TAGLN         |
| apigenin  | TRPM2         |
| apigenin  | TNF           |
| apigenin  | TNFRSF10B     |
| apigenin  | FAS           |
| apigenin  | TP63          |
| apigenin  | TP73          |

|          |         |
|----------|---------|
| apigenin | AXL     |
| apigenin | PTPN11  |
| apigenin | UGT1A1  |
| apigenin | UGT1A6  |
| apigenin | ABCG2   |
| apigenin | PLAU    |
| apigenin | UTRN    |
| apigenin | VEGFA   |
| apigenin | VDR     |
| apigenin | WISP2   |
| apigenin | XDH     |
| apigenin | BAD     |
| apigenin | BCL2L1  |
| apigenin | B3GALT5 |
| apigenin | GUSB    |
| apigenin | MANBA   |
| apigenin | CSNK2A1 |
| apigenin | CFLAR   |
| apigenin | CASP3   |
| apigenin | CASP9   |
| apigenin | CAT     |
| apigenin | CD40LG  |
| apigenin | TP53    |
| apigenin | CXCR4   |
| apigenin | CDK1    |
| apigenin | CDK4    |
| apigenin | CDKN2C  |
| apigenin | CDK6    |
| apigenin | CDKN1A  |
| apigenin | CDKN2A  |
| apigenin | CFTR    |
| apigenin | CYCS    |
| apigenin | CYP11B1 |
| apigenin | CYP19A1 |
| apigenin | CYP1A1  |
| apigenin | CYP1A2  |
| apigenin | CYP3A4  |
| apigenin | TOP1    |
| apigenin | TOP2A   |
| apigenin | TOP2B   |
| apigenin | TOP3A   |
| apigenin | TOP3B   |
| apigenin | TOP1MT  |
| apigenin | ALG5    |
| apigenin | HERC5   |
| apigenin | MDM2    |
| apigenin | XIAP    |
| apigenin | ELAVL1  |
| apigenin | ACHE    |
| apigenin | ACACA   |
| apigenin | HSD17B1 |
| apigenin | ESR1    |
| apigenin | ESR2    |
| apigenin | EEF1E1  |
| apigenin | EIF6    |
| apigenin | PTK2    |
| apigenin | FOXO1   |
| apigenin | FBP1    |
| apigenin | CCND1   |

|              |          |
|--------------|----------|
| apigenin     | CCND2    |
| apigenin     | CCNB1    |
| apigenin     | GMNN     |
| apigenin     | AHSA1    |
| apigenin     | G6PC     |
| apigenin     | GAD1     |
| apigenin     | GCLC     |
| apigenin     | GSK3B    |
| apigenin     | HMOX1    |
| apigenin     | MS4A2    |
| apigenin     | APC      |
| apigenin     | SPAM1    |
| apigenin     | HIF1A    |
| apigenin     | MCL1     |
| apigenin     | IKBKB    |
| apigenin     | INS      |
| apigenin     | INSR     |
| apigenin     | IGF1R    |
| apigenin     | ICAM1    |
| apigenin     | IFNG     |
| apigenin     | IL13     |
| apigenin     | IL2      |
| apigenin     | IL4      |
| apigenin     | MMP1     |
| apigenin     | ALPI     |
| apigenin     | CD38     |
| apigenin     | FCER2    |
| apigenin     | LTA      |
| apigenin     | KARS     |
| apigenin     | MMP9     |
| apigenin     | PSMD3    |
| apigenin     | MAPK1    |
| apigenin     | MAPK3    |
| apigenin     | AKR1C3   |
| apigenin     | ABCB1    |
| apigenin     | ABCC1    |
| apigenin     | AAGAB    |
| apigenin     | NOX4     |
| apigenin     | IKBKG    |
| apigenin     | NFKBIA   |
| apigenin     | NR1I2    |
| apigenin     | ODC1     |
| apigenin     | SERPINE1 |
| apigenin     | PARP1    |
| Stigmasterol | SLCO1B1  |
| Stigmasterol | ABCA1    |
| Stigmasterol | ABCG5    |
| Stigmasterol | ABCG8    |
| Stigmasterol | HMGCR    |
| kaempferol   | POU5F1   |
| kaempferol   | PGR      |
| kaempferol   | PTGES    |
| kaempferol   | PTGS2    |
| kaempferol   | PSCA     |
| kaempferol   | GREB1    |
| kaempferol   | SRC      |
| kaempferol   | TP53I3   |
| kaempferol   | AKT1     |
| kaempferol   | RB1      |



|            |           |
|------------|-----------|
| kaempferol | RPS6KA3   |
| kaempferol | UGT8      |
| kaempferol | SLPI      |
| kaempferol | PPP3CA    |
| kaempferol | STAT1     |
| kaempferol | STAT3     |
| kaempferol | SLC2A1    |
| kaempferol | SLC2A4    |
| kaempferol | BAX       |
| kaempferol | BCL2      |
| kaempferol | ALOX12    |
| kaempferol | ALOX15    |
| kaempferol | ALOX5     |
| kaempferol | SOD1      |
| kaempferol | AKR1E2    |
| kaempferol | AHR       |
| kaempferol | TFAM      |
| kaempferol | JUN       |
| kaempferol | RELA      |
| kaempferol | TFF1      |
| kaempferol | TYW1      |
| kaempferol | TNF       |
| kaempferol | TNFRSF11B |
| kaempferol | TP63      |
| kaempferol | TP73      |
| kaempferol | DIO1      |
| kaempferol | UGT3A1    |
| kaempferol | UGT3A1    |
| kaempferol | UGT1A1    |
| kaempferol | UGT1A10   |
| kaempferol | UGT1A3    |
| kaempferol | UGT1A4    |
| kaempferol | UGT1A5    |
| kaempferol | UGT1A6    |
| kaempferol | UGT1A7    |
| kaempferol | UGT1A8    |
| kaempferol | UGT1A9    |
| kaempferol | UGT2A1    |
| kaempferol | UGT2A3    |
| kaempferol | UGT2B10   |
| kaempferol | UGT2B11   |
| kaempferol | UGT2B15   |
| kaempferol | UGT2B17   |
| kaempferol | UGT2B28   |
| kaempferol | UGT2B4    |
| kaempferol | UGT2B7    |
| kaempferol | UGT3A1    |
| kaempferol | UGT3A2    |
| kaempferol | ABCG2     |
| kaempferol | UTRN      |
| kaempferol | VCAM1     |
| kaempferol | WISP2     |
| kaempferol | XDH       |
| kaempferol | B3GALT5   |
| kaempferol | CASP3     |
| kaempferol | CCL2      |
| kaempferol | SFN       |
| kaempferol | TP53      |
| kaempferol | CRP       |

|            |          |
|------------|----------|
| kaempferol | CDK1     |
| kaempferol | CDK2     |
| kaempferol | CDKN2C   |
| kaempferol | CDK6     |
| kaempferol | CDKN1A   |
| kaempferol | CYP1A1   |
| kaempferol | CYP1A2   |
| kaempferol | CYP1B1   |
| kaempferol | CYP2B6   |
| kaempferol | CYP3A4   |
| kaempferol | MMP2     |
| kaempferol | SELE     |
| kaempferol | HSD17B1  |
| kaempferol | HSD17B2  |
| kaempferol | ESR1     |
| kaempferol | ESR2     |
| kaempferol | FBP1     |
| kaempferol | CCNB1    |
| kaempferol | AHSA1    |
| kaempferol | GCLC     |
| kaempferol | GSTA1    |
| kaempferol | GSTM1    |
| kaempferol | GSTM2    |
| kaempferol | GSTP1    |
| kaempferol | GADD45B  |
| kaempferol | DBI      |
| kaempferol | HMOX1    |
| kaempferol | HAS2     |
| kaempferol | IKBKB    |
| kaempferol | INSR     |
| kaempferol | IGF1R    |
| kaempferol | IGF2     |
| kaempferol | ITGA2    |
| kaempferol | ICAM1    |
| kaempferol | IL2      |
| kaempferol | BBC3     |
| kaempferol | MMP1     |
| kaempferol | MT2A     |
| kaempferol | AKR1A1   |
| kaempferol | MTRR     |
| kaempferol | PSMD3    |
| kaempferol | UCP3     |
| kaempferol | MAPK8    |
| kaempferol | AKR1B10  |
| kaempferol | AKR1C3   |
| kaempferol | ABCC1    |
| kaempferol | AKR1B1   |
| kaempferol | NOX4     |
| kaempferol | POR      |
| kaempferol | NDOR1    |
| kaempferol | NOS1     |
| kaempferol | NOS3     |
| kaempferol | NOS2     |
| kaempferol | NFE2L2   |
| kaempferol | NR1I2    |
| kaempferol | NR1I3    |
| kaempferol | N/A      |
| kaempferol | PPARG    |
| kaempferol | PPARGC1A |

|              |          |
|--------------|----------|
| Trifolin     | ABCG2    |
| Trifolin     | ALDH2    |
| Trifolin     | ABCG2    |
| PEL          | ADH6     |
| PEL          | TAAR1    |
| PEL          | ADH1B    |
| ursolic acid | PTGER3   |
| ursolic acid | PTGS1    |
| ursolic acid | PTGS2    |
| ursolic acid | PRKCG    |
| ursolic acid | FOS      |
| ursolic acid | RPS6KB1  |
| ursolic acid | ERN1     |
| ursolic acid | STAT3    |
| ursolic acid | BAX      |
| ursolic acid | BCL2     |
| ursolic acid | MMP3     |
| ursolic acid | MMP10    |
| ursolic acid | SCLY     |
| ursolic acid | BAK1     |
| ursolic acid | JUN      |
| ursolic acid | RELA     |
| ursolic acid | TGFB1    |
| ursolic acid | TNF      |
| ursolic acid | FASLG    |
| ursolic acid | PTPN1    |
| ursolic acid | PTPN2    |
| ursolic acid | PTPN6    |
| ursolic acid | PLAU     |
| ursolic acid | VEGFA    |
| ursolic acid | BIRC5    |
| ursolic acid | FGF2     |
| ursolic acid | BCL2L1   |
| ursolic acid | CASP1    |
| ursolic acid | CASP3    |
| ursolic acid | CASP8    |
| ursolic acid | CASP9    |
| ursolic acid | CTSB     |
| ursolic acid | TP53     |
| ursolic acid | MAPK8IP2 |
| ursolic acid | ATF2     |
| ursolic acid | CREB1    |
| ursolic acid | CDK4     |
| ursolic acid | CDK6     |
| ursolic acid | CDKN1A   |
| ursolic acid | CDKN1B   |
| ursolic acid | CYP2C19  |
| ursolic acid | MMP2     |
| ursolic acid | DDIT3    |
| ursolic acid | TOP1     |
| ursolic acid | TOP2A    |
| ursolic acid | DUOX2    |

|              |          |
|--------------|----------|
| ursolic acid | HERC5    |
| ursolic acid | ENPP7    |
| ursolic acid | HSPA5    |
| ursolic acid | SELE     |
| ursolic acid | EIF4EBP1 |
| ursolic acid | FASN     |
| ursolic acid | CCND1    |
| ursolic acid | CCND2    |
| ursolic acid | CCND3    |
| ursolic acid | CCNE1    |
| ursolic acid | CSF2     |
| ursolic acid | MCL1     |
| ursolic acid | ICAM1    |
| ursolic acid | IL1B     |
| ursolic acid | IL6      |
| ursolic acid | MMP1     |
| ursolic acid | LITAF    |
| ursolic acid | MMP9     |
| ursolic acid | MAPK8    |
| ursolic acid | AKR1B10  |
| ursolic acid | GAP43    |
| ursolic acid | NFKBIA   |
| ursolic acid | NOS3     |
| ursolic acid | RORC     |
| ursolic acid | GPBAR1   |
| ursolic acid | INPPL1   |
| ursolic acid | PECAM1   |
| caffeic acid | ABHD12B  |
| caffeic acid | ABHD13   |
| caffeic acid | ABHD17A  |
| caffeic acid | ABHD17B  |
| caffeic acid | ABHD17C  |
| caffeic acid | PRKCB    |
| caffeic acid | SPNS1    |
| caffeic acid | SELP     |
| caffeic acid | RAC1     |
| caffeic acid | SLC17A3  |
| caffeic acid | SLC2A1   |
| caffeic acid | SLC2A14  |
| caffeic acid | SLC2A2   |
| caffeic acid | SLC2A3   |
| caffeic acid | SLC2A4   |
| caffeic acid | SLC2A5   |
| caffeic acid | SLC2A7   |
| caffeic acid | SLC2A9   |
| caffeic acid | SLC22A1  |
| caffeic acid | SLC22A10 |
| caffeic acid | SLC22A11 |
| caffeic acid | SLC22A12 |
| caffeic acid | SLC22A2  |
| caffeic acid | SLC22A23 |
| caffeic acid | SLC22A25 |
| caffeic acid | SLC22A6  |
| caffeic acid | SLC22A7  |
| caffeic acid | SLC22A8  |
| caffeic acid | SLC22A9  |
| caffeic acid | ALOX15   |
| caffeic acid | SLC16A12 |
| caffeic acid | ALOX5    |

|                      |          |
|----------------------|----------|
| caffeic acid         | N/A      |
| caffeic acid         | SV2B     |
| caffeic acid         | SV2C     |
| caffeic acid         | TNF      |
| caffeic acid         | TYR      |
| caffeic acid         | BTK      |
| caffeic acid         | SLC16A11 |
| caffeic acid         | SLC2A11  |
| caffeic acid         | SPNS2    |
| caffeic acid         | SLC22A24 |
| caffeic acid         | BAAT     |
| caffeic acid         | CYP1A1   |
| caffeic acid         | PGD      |
| caffeic acid         | MMP2     |
| caffeic acid         | MIF      |
| caffeic acid         | SLC33A1  |
| caffeic acid         | GFAP     |
| caffeic acid         | G6PD     |
| caffeic acid         | ACOT1    |
| caffeic acid         | ACOT2    |
| caffeic acid         | ACOT4    |
| caffeic acid         | HAL      |
| caffeic acid         | IGF2     |
| caffeic acid         | MMP1     |
| caffeic acid         | MIF      |
| caffeic acid         | MFSD1    |
| caffeic acid         | MFSD3    |
| caffeic acid         | MMP9     |
| caffeic acid         | MAPK1    |
| caffeic acid         | MAPK8    |
| caffeic acid         | ABHD12   |
| caffeic acid         | SLC16A1  |
| caffeic acid         | SLC16A10 |
| caffeic acid         | SLC16A8  |
| caffeic acid         | SLC16A5  |
| caffeic acid         | SLC16A6  |
| caffeic acid         | SLC16A9  |
| caffeic acid         | MPO      |
| caffeic acid         | NOS3     |
| caffeic acid         | NDP      |
| caffeic acid         | ACOT6    |
| caffeic acid         | SPNS3    |
| protocatechuic acid  | PRKCA    |
| protocatechuic acid  | PRKCB    |
| protocatechuic acid  | PRKCG    |
| protocatechuic acid  | PRKCZ    |
| protocatechuic acid  | NR5A1    |
| protocatechuic acid  | CA14     |
| protocatechuic acid  | CA2      |
| protocatechuic acid  | COMT     |
| protocatechuic acid  | DHODH    |
| protocatechuic acid  | DPYD     |
| protocatechuic acid  | MGAM     |
| protocatechuic acid  | MPO      |
| protocatechuic acid  | ENO1     |
| protocatechualdehyde | ODC1     |
| hexanoic acid        | PRSS33   |
| hexanoic acid        | PRSS36   |
| hexanoic acid        | TISP43   |

|               |           |
|---------------|-----------|
| hexanoic acid | GPR132    |
| hexanoic acid | GNRH1     |
| hexanoic acid | GNRH2     |
| hexanoic acid | PROKR1    |
| hexanoic acid | PROKR2    |
| hexanoic acid | PROK1     |
| hexanoic acid | PROK2     |
| hexanoic acid | PMCH      |
| hexanoic acid | MLN       |
| hexanoic acid | PRSS37    |
| hexanoic acid | PTGER1    |
| hexanoic acid | PTGFR     |
| hexanoic acid | PRSS8     |
| hexanoic acid | KLK3      |
| hexanoic acid | TAC1      |
| hexanoic acid | TMPRSS12  |
| hexanoic acid | ABHD12B   |
| hexanoic acid | ABHD13    |
| hexanoic acid | ABHD17A   |
| hexanoic acid | ABHD17B   |
| hexanoic acid | ABHD17C   |
| hexanoic acid | APP       |
| hexanoic acid | KLK12     |
| hexanoic acid | F2R       |
| hexanoic acid | F2RL1     |
| hexanoic acid | F2RL2     |
| hexanoic acid | F2RL3     |
| hexanoic acid | F2        |
| hexanoic acid | TRH       |
| hexanoic acid | AGT       |
| hexanoic acid | GPR65     |
| hexanoic acid | P2RY10    |
| hexanoic acid | QRFPR     |
| hexanoic acid | ANXA1     |
| hexanoic acid | PRSS27    |
| hexanoic acid | PRSS38    |
| hexanoic acid | PRSS53    |
| hexanoic acid | HPN       |
| hexanoic acid | SAA1      |
| hexanoic acid | SH2D4A    |
| hexanoic acid | PRSS48    |
| hexanoic acid | LPA       |
| hexanoic acid | PRSS57    |
| hexanoic acid | TMPRSS11A |
| hexanoic acid | TRIM66    |
| hexanoic acid | HPR       |
| hexanoic acid | MTRNR2L12 |
| hexanoic acid | TACR2     |
| hexanoic acid | TACR1     |
| hexanoic acid | ST14      |
| hexanoic acid | TAC3      |
| hexanoic acid | PRSS21    |
| hexanoic acid | TBXA2R    |
| hexanoic acid | TRHR      |
| hexanoic acid | PLAT      |
| hexanoic acid | TMPRSS11D |
| hexanoic acid | TMPRSS11E |
| hexanoic acid | TMPRSS2   |
| hexanoic acid | TMPRSS3   |

|               |           |
|---------------|-----------|
| hexanoic acid | TMPRSS4   |
| hexanoic acid | TMPRSS5   |
| hexanoic acid | TMPRSS6   |
| hexanoic acid | TMPRSS9   |
| hexanoic acid | PRSS1     |
| hexanoic acid | PRSS3     |
| hexanoic acid | TPSAB1    |
| hexanoic acid | TPSD1     |
| hexanoic acid | TPSG1     |
| hexanoic acid | AGTR1     |
| hexanoic acid | N/A       |
| hexanoic acid | GPR17     |
| hexanoic acid | PLAU      |
| hexanoic acid | UTS2      |
| hexanoic acid | UTS2R     |
| hexanoic acid | UTS2B     |
| hexanoic acid | LTB4R2    |
| hexanoic acid | AVPR1A    |
| hexanoic acid | AVP       |
| hexanoic acid | PROC      |
| hexanoic acid | PROZ      |
| hexanoic acid | TMPRSS11B |
| hexanoic acid | CORIN     |
| hexanoic acid | PRSS58    |
| hexanoic acid | ZNF552    |
| hexanoic acid | TMPRSS11F |
| hexanoic acid | AZU1      |
| hexanoic acid | PRSS46    |
| hexanoic acid | KLK9      |
| hexanoic acid | BDKRB1    |
| hexanoic acid | CTNNBL1   |
| hexanoic acid | BAAT      |
| hexanoic acid | PRSS22    |
| hexanoic acid | PRSS50    |
| hexanoic acid | OXSM      |
| hexanoic acid | CTSG      |
| hexanoic acid | CFB       |
| hexanoic acid | XCR1      |
| hexanoic acid | CCK       |
| hexanoic acid | CCKAR     |
| hexanoic acid | CMA1      |
| hexanoic acid | CTRC      |
| hexanoic acid | CELA1     |
| hexanoic acid | CELA2A    |
| hexanoic acid | CELA2B    |
| hexanoic acid | CELA3A    |
| hexanoic acid | CELA3B    |
| hexanoic acid | CTRL      |
| hexanoic acid | CTRB1     |
| hexanoic acid | CTRB2     |
| hexanoic acid | HTR2A     |
| hexanoic acid | HTR2B     |
| hexanoic acid | F9        |
| hexanoic acid | HTR2C     |
| hexanoic acid | F7        |
| hexanoic acid | F10       |
| hexanoic acid | F11       |
| hexanoic acid | F12       |
| hexanoic acid | C1RL      |

|               |          |
|---------------|----------|
| hexanoic acid | C1S      |
| hexanoic acid | C2       |
| hexanoic acid | CFB      |
| hexanoic acid | CFD      |
| hexanoic acid | CFI      |
| hexanoic acid | CYSLTR1  |
| hexanoic acid | CYSLTR2  |
| hexanoic acid | XCL2     |
| hexanoic acid | EDNRB    |
| hexanoic acid | EDN1     |
| hexanoic acid | EDNRA    |
| hexanoic acid | EDN2     |
| hexanoic acid | EDN3     |
| hexanoic acid | TMPRSS15 |
| hexanoic acid | ACR      |
| hexanoic acid | NPVF     |
| hexanoic acid | FFAR1    |
| hexanoic acid | FFAR2    |
| hexanoic acid | FFAR3    |
| hexanoic acid | GAST     |
| hexanoic acid | CCKBR    |
| hexanoic acid | GRP      |
| hexanoic acid | GRPR     |
| hexanoic acid | GCG      |
| hexanoic acid | GCGR     |
| hexanoic acid | GNRHR    |
| hexanoic acid | GPR4     |
| hexanoic acid | GPRC6A   |
| hexanoic acid | GZMA     |
| hexanoic acid | GZMB     |
| hexanoic acid | GZMH     |
| hexanoic acid | GZMK     |
| hexanoic acid | GZMM     |
| hexanoic acid | GRB2     |
| hexanoic acid | GHSR     |
| hexanoic acid | GNG2     |
| hexanoic acid | GNAQ     |
| hexanoic acid | GNA11    |
| hexanoic acid | GNA14    |
| hexanoic acid | GNA15    |
| hexanoic acid | ACOT1    |
| hexanoic acid | HP       |
| hexanoic acid | ACOT2    |
| hexanoic acid | ACOT4    |
| hexanoic acid | HGF      |
| hexanoic acid | HGFAC    |
| hexanoic acid | PRSS42   |
| hexanoic acid | HRH1     |
| hexanoic acid | PRSS45   |
| hexanoic acid | HABP2    |
| hexanoic acid | ISYNA1   |
| hexanoic acid | KLK1     |
| hexanoic acid | KLK10    |
| hexanoic acid | KLK11    |
| hexanoic acid | KLK13    |
| hexanoic acid | KLK15    |
| hexanoic acid | KLK2     |
| hexanoic acid | KLK5     |
| hexanoic acid | KLK6     |



|               |         |
|---------------|---------|
| hexanoic acid | KLK7    |
| hexanoic acid | KLK8    |
| hexanoic acid | TMPRSS7 |
| hexanoic acid | KNG1    |
| hexanoic acid | KISS1R  |
| hexanoic acid | KLK14   |
| hexanoic acid | LTB4R   |
| hexanoic acid | XCL1    |
| hexanoic acid | LPAR1   |
| hexanoic acid | LPAR2   |
| hexanoic acid | LPAR3   |
| hexanoic acid | LPAR5   |
| hexanoic acid | LPAR6   |
| hexanoic acid | MST1    |
| hexanoic acid | MASP1   |
| hexanoic acid | MASP2   |
| hexanoic acid | MCHR1   |
| hexanoic acid | MCHR2   |
| hexanoic acid | OPN4    |
| hexanoic acid | GRM1    |
| hexanoic acid | GRM5    |
| hexanoic acid | KISS1   |
| hexanoic acid | CASR    |
| hexanoic acid | ABHD12  |
| hexanoic acid | MLNR    |
| hexanoic acid | AKR1B1  |
| hexanoic acid | CHRM1   |
| hexanoic acid | CHRM3   |
| hexanoic acid | CHRM5   |
| hexanoic acid | PRTN3   |
| hexanoic acid | OVCH1   |
| hexanoic acid | NMB     |
| hexanoic acid | NMBR    |
| hexanoic acid | TACR3   |
| hexanoic acid | NMS     |
| hexanoic acid | NMU     |
| hexanoic acid | NMUR1   |
| hexanoic acid | NMUR2   |
| hexanoic acid | PRSS55  |
| hexanoic acid | NPFFR1  |
| hexanoic acid | NPFFR2  |
| hexanoic acid | ADRA1A  |
| hexanoic acid | NPS     |
| hexanoic acid | NPSR1   |
| hexanoic acid | NTSR1   |
| hexanoic acid | NTSR2   |
| hexanoic acid | NTS     |
| hexanoic acid | PRSS12  |
| hexanoic acid | ELANE   |
| hexanoic acid | FPR2    |
| hexanoic acid | ADRA1B  |
| hexanoic acid | ADRA1D  |
| hexanoic acid | ACOT6   |
| hexanoic acid | QRFP    |
| hexanoic acid | HCRT    |
| hexanoic acid | HCRTR1  |
| hexanoic acid | HCRTR2  |
| hexanoic acid | GPR68   |
| hexanoic acid | OXTR    |

|               |        |
|---------------|--------|
| hexanoic acid | OXT    |
| hexanoic acid | P2RY1  |
| hexanoic acid | P2RY2  |
| hexanoic acid | P2RY6  |
| hexanoic acid | KLKB1  |
| hexanoic acid | PLG    |
| hexanoic acid | PTAFR  |
| palmitic acid | PPARA  |
| palmitic acid | GPR101 |
| palmitic acid | GPR132 |
| palmitic acid | GPR139 |
| palmitic acid | GPR148 |
| palmitic acid | GPR151 |
| palmitic acid | GPR176 |
| palmitic acid | GPR19  |
| palmitic acid | GPR21  |
| palmitic acid | GPR27  |
| palmitic acid | GPR37  |
| palmitic acid | GPR45  |
| palmitic acid | GPR52  |
| palmitic acid | GPR61  |
| palmitic acid | GPR62  |
| palmitic acid | GPR63  |
| palmitic acid | GPR83  |
| palmitic acid | GPR85  |
| palmitic acid | GPR88  |
| palmitic acid | PAEP   |
| palmitic acid | GNRH1  |
| palmitic acid | GNRH2  |
| palmitic acid | PROKR1 |
| palmitic acid | PROKR2 |
| palmitic acid | PROK1  |
| palmitic acid | PROK2  |
| palmitic acid | PRLHR  |
| palmitic acid | PMCH   |
| palmitic acid | MLN    |
| palmitic acid | PTGIR  |
| palmitic acid | PTGDR  |
| palmitic acid | PTGES  |
| palmitic acid | PTGER1 |
| palmitic acid | PTGER2 |
| palmitic acid | PTGER3 |
| palmitic acid | PTGER4 |
| palmitic acid | PTGFR  |
| palmitic acid | PTGS1  |
| palmitic acid | PTGS2  |
| palmitic acid | PTGDS  |
| palmitic acid | TAC1   |
| palmitic acid | APP    |
| palmitic acid | GPR22  |
| palmitic acid | PRKACA |
| palmitic acid | PKDCC  |
| palmitic acid | PRKACA |
| palmitic acid | AR     |
| palmitic acid | TEK    |
| palmitic acid | F2R    |
| palmitic acid | F2RL1  |
| palmitic acid | F2RL2  |
| palmitic acid | F2RL3  |

|               |          |
|---------------|----------|
| palmitic acid | ANGPTL4  |
| palmitic acid | TESK2    |
| palmitic acid | ICMT     |
| palmitic acid | PTK6     |
| palmitic acid | PRG3     |
| palmitic acid | TRH      |
| palmitic acid | MAP3K21  |
| palmitic acid | MOS      |
| palmitic acid | AGT      |
| palmitic acid | RET      |
| palmitic acid | SRC      |
| palmitic acid | GPR65    |
| palmitic acid | SFTPA1   |
| palmitic acid | SFTPA2   |
| palmitic acid | GUSBP1   |
| palmitic acid | HCK      |
| palmitic acid | HKDC1    |
| palmitic acid | ASAH2B   |
| palmitic acid | P2RY10   |
| palmitic acid | QRFPR    |
| palmitic acid | RBP1     |
| palmitic acid | PDHA1    |
| palmitic acid | AKT1     |
| palmitic acid | RGL1     |
| palmitic acid | RAB1A    |
| palmitic acid | RAB1B    |
| palmitic acid | RAB33A   |
| palmitic acid | RAB33B   |
| palmitic acid | RAB43    |
| palmitic acid | ANKRD1   |
| palmitic acid | RIPK1    |
| palmitic acid | RIPK2    |
| palmitic acid | RIPK3    |
| palmitic acid | RIPK4    |
| palmitic acid | FLT3     |
| palmitic acid | RCVRN    |
| palmitic acid | REG3A    |
| palmitic acid | REG4     |
| palmitic acid | RXFP3    |
| palmitic acid | RXFP4    |
| palmitic acid | REN      |
| palmitic acid | RXRA     |
| palmitic acid | RPE65    |
| palmitic acid | GPR150   |
| palmitic acid | RHO      |
| palmitic acid | RRM2     |
| palmitic acid | RRM2B    |
| palmitic acid | RPS6KB1  |
| palmitic acid | RGR      |
| palmitic acid | ANXA1    |
| palmitic acid | OLAH     |
| palmitic acid | SCARB1   |
| palmitic acid | SEC14L2  |
| palmitic acid | SEC14L2  |
| palmitic acid | SEC14L2  |
| palmitic acid | DBI      |
| palmitic acid | STK40    |
| palmitic acid | CDC42BPB |
| palmitic acid | MTOR     |

|               |           |
|---------------|-----------|
| palmitic acid | NIM1K     |
| palmitic acid | PIM1      |
| palmitic acid | PIM2      |
| palmitic acid | PIM3      |
| palmitic acid | CD1D      |
| palmitic acid | STK11     |
| palmitic acid | ERN1      |
| palmitic acid | ERN2      |
| palmitic acid | PPP3CA    |
| palmitic acid | PPP2R4    |
| palmitic acid | PPP3CA    |
| palmitic acid | ALB       |
| palmitic acid | SAA1      |
| palmitic acid | SAA2      |
| palmitic acid | OPN1SW    |
| palmitic acid | APLNR     |
| palmitic acid | APOA1     |
| palmitic acid | APOA2     |
| palmitic acid | APOA4     |
| palmitic acid | APOA5     |
| palmitic acid | APOB      |
| palmitic acid | APOC3     |
| palmitic acid | APOE      |
| palmitic acid | SLC2A2    |
| palmitic acid | SLC22A8   |
| palmitic acid | SLC22A11  |
| palmitic acid | SLC22A5   |
| palmitic acid | SLC22A6   |
| palmitic acid | SLC22A8   |
| palmitic acid | APOM      |
| palmitic acid | BAX       |
| palmitic acid | SSTR1     |
| palmitic acid | SSTR2     |
| palmitic acid | SSTR4     |
| palmitic acid | SSTR5     |
| palmitic acid | BCL2      |
| palmitic acid | DEGS1     |
| palmitic acid | FDFT1     |
| palmitic acid | SREBF1    |
| palmitic acid | SREBF2    |
| palmitic acid | N/A       |
| palmitic acid | MFN1      |
| palmitic acid | NCOR2     |
| palmitic acid | GPR161    |
| palmitic acid | ARF6      |
| palmitic acid | N/A       |
| palmitic acid | CSMD1     |
| palmitic acid | N/A       |
| palmitic acid | CLEC2L    |
| palmitic acid | MTRNR2L12 |
| palmitic acid | TMIGD3    |
| palmitic acid | IRAK4     |
| palmitic acid | FADS1     |
| palmitic acid | PLA2G2C   |
| palmitic acid | TACR2     |
| palmitic acid | TACR1     |
| palmitic acid | SOD1      |
| palmitic acid | SMARCD3   |
| palmitic acid | KLRG2     |

|               |           |
|---------------|-----------|
| palmitic acid | MATK      |
| palmitic acid | SDC1      |
| palmitic acid | SDC2      |
| palmitic acid | SDC3      |
| palmitic acid | SDC4      |
| palmitic acid | TAC3      |
| palmitic acid | CLEC5A    |
| palmitic acid | GPR37L1   |
| palmitic acid | CD1E      |
| palmitic acid | TSSK1B    |
| palmitic acid | TSSK2     |
| palmitic acid | TSSK3     |
| palmitic acid | TSSK4     |
| palmitic acid | TXNRD1    |
| palmitic acid | THBS1     |
| palmitic acid | THBS2     |
| palmitic acid | THBS3     |
| palmitic acid | THBS4     |
| palmitic acid | TBXA2R    |
| palmitic acid | TPO       |
| palmitic acid | TRHR      |
| palmitic acid | TIAM2     |
| palmitic acid | TLR2      |
| palmitic acid | TLR4      |
| palmitic acid | TAAR1     |
| palmitic acid | TAAR2     |
| palmitic acid | TAAR5     |
| palmitic acid | TAAR6     |
| palmitic acid | TAAR8     |
| palmitic acid | TRAPPC3   |
| palmitic acid | TRAPPC1   |
| palmitic acid | TRAPPC2   |
| palmitic acid | TRAPPC3   |
| palmitic acid | TRAPPC3L  |
| palmitic acid | TRAPPC4   |
| palmitic acid | TRAPPC5   |
| palmitic acid | TRAPPC6A  |
| palmitic acid | TRAPPC6B  |
| palmitic acid | ASGR1     |
| palmitic acid | SP1       |
| palmitic acid | TRIB1     |
| palmitic acid | TRIB2     |
| palmitic acid | TRIB3     |
| palmitic acid | TGS1      |
| palmitic acid | TYW1      |
| palmitic acid | GLTP      |
| palmitic acid | HNF4A     |
| palmitic acid | TNF       |
| palmitic acid | TNFRSF10B |
| palmitic acid | TNFRSF21  |
| palmitic acid | AGTR1     |
| palmitic acid | AGTR2     |
| palmitic acid | ABL1      |
| palmitic acid | ABL1      |
| palmitic acid | ABL2      |
| palmitic acid | BLK       |
| palmitic acid | BTK       |
| palmitic acid | CSK       |
| palmitic acid | FGR       |

|               |         |
|---------------|---------|
| palmitic acid | FYN     |
| palmitic acid | ITK     |
| palmitic acid | JAK1    |
| palmitic acid | JAK2    |
| palmitic acid | JAK3    |
| palmitic acid | LCK     |
| palmitic acid | LYN     |
| palmitic acid | MERTK   |
| palmitic acid | TIE1    |
| palmitic acid | TYRO3   |
| palmitic acid | AXL     |
| palmitic acid | SRMS    |
| palmitic acid | STYK1   |
| palmitic acid | SYK     |
| palmitic acid | TEC     |
| palmitic acid | ROR1    |
| palmitic acid | TXK     |
| palmitic acid | YES1    |
| palmitic acid | ZAP70   |
| palmitic acid | PTPN1   |
| palmitic acid | ABCA1   |
| palmitic acid | MLXIP   |
| palmitic acid | UGT1A9  |
| palmitic acid | ABCB1   |
| palmitic acid | ABCE1   |
| palmitic acid | ABCG1   |
| palmitic acid | HELZ2   |
| palmitic acid | MYO7A   |
| palmitic acid | GPR17   |
| palmitic acid | ABCB1   |
| palmitic acid | ABCB1   |
| palmitic acid | UTS2    |
| palmitic acid | UTS2R   |
| palmitic acid | UTS2B   |
| palmitic acid | FLT1    |
| palmitic acid | KDR     |
| palmitic acid | FLT4    |
| palmitic acid | ACLY    |
| palmitic acid | LTB4R2  |
| palmitic acid | AVPR1A  |
| palmitic acid | AVPR1B  |
| palmitic acid | AVPR2   |
| palmitic acid | AVP     |
| palmitic acid | SLC27A2 |
| palmitic acid | RRH     |
| palmitic acid | XBP1    |
| palmitic acid | CR1L    |
| palmitic acid | CLEC12A |
| palmitic acid | OPN5    |
| palmitic acid | BDKRB1  |
| palmitic acid | HSPG2   |
| palmitic acid | CD72    |
| palmitic acid | ABL1    |
| palmitic acid | ADRB1   |
| palmitic acid | HMGCR   |
| palmitic acid | ADRB2   |
| palmitic acid | APOH    |
| palmitic acid | B2M     |
| palmitic acid | ADRB3   |

|               |         |
|---------------|---------|
| palmitic acid | BAAT    |
| palmitic acid | SULT2A1 |
| palmitic acid | BRS3    |
| palmitic acid | PRG2    |
| palmitic acid | BMP4    |
| palmitic acid | C4BPA   |
| palmitic acid | C4BPB   |
| palmitic acid | ABL1    |
| palmitic acid | PPP3R1  |
| palmitic acid | PLA2G5  |
| palmitic acid | PRKACA  |
| palmitic acid | PKIA    |
| palmitic acid | PKIA    |
| palmitic acid | CNR1    |
| palmitic acid | CNR2    |
| palmitic acid | MLXIPL  |
| palmitic acid | CES4A   |
| palmitic acid | CES5A   |
| palmitic acid | N/A     |
| palmitic acid | CRAT    |
| palmitic acid | CPT1C   |
| palmitic acid | CPT1A   |
| palmitic acid | CPT1B   |
| palmitic acid | CPT2    |
| palmitic acid | COMP    |
| palmitic acid | CASP6   |
| palmitic acid | CTNNB1  |
| palmitic acid | EPHA6   |
| palmitic acid | CCR1    |
| palmitic acid | CCR2    |
| palmitic acid | CCR3    |
| palmitic acid | CCR4    |
| palmitic acid | CCR5    |
| palmitic acid | CCR9    |
| palmitic acid | CCL2    |
| palmitic acid | CD209   |
| palmitic acid | TP53    |
| palmitic acid | UGCG    |
| palmitic acid | ALAS1   |
| palmitic acid | MAP3K20 |
| palmitic acid | XCR1    |
| palmitic acid | CCK     |
| palmitic acid | CCKAR   |
| palmitic acid | CYP7A1  |
| palmitic acid | CHAT    |
| palmitic acid | SLC44A1 |
| palmitic acid | PCYT1A  |
| palmitic acid | CHODL   |
| palmitic acid | CHD9    |
| palmitic acid | HTR1A   |
| palmitic acid | HTR1B   |
| palmitic acid | HTR1E   |
| palmitic acid | HTR1F   |
| palmitic acid | HTR2A   |
| palmitic acid | HTR2B   |
| palmitic acid | HTR2C   |
| palmitic acid | HTR4    |
| palmitic acid | HTR5A   |
| palmitic acid | HTR6    |

|               |         |
|---------------|---------|
| palmitic acid | HTR7    |
| palmitic acid | CLPS    |
| palmitic acid | COL1A1  |
| palmitic acid | CD55    |
| palmitic acid | CTGF    |
| palmitic acid | COG2    |
| palmitic acid | CREBBP  |
| palmitic acid | CLEC1A  |
| palmitic acid | CLEC1B  |
| palmitic acid | CLEC11A |
| palmitic acid | CLEC12B |
| palmitic acid | CLEC18A |
| palmitic acid | CLEC18B |
| palmitic acid | CLEC18C |
| palmitic acid | CLEC2A  |
| palmitic acid | CLEC2B  |
| palmitic acid | CLEC2D  |
| palmitic acid | CLEC3A  |
| palmitic acid | CLEC4A  |
| palmitic acid | CLEC4E  |
| palmitic acid | CLEC4G  |
| palmitic acid | CD207   |
| palmitic acid | CLEC4M  |
| palmitic acid | GPR142  |
| palmitic acid | CLEC6A  |
| palmitic acid | CLEC7A  |
| palmitic acid | CLEC9A  |
| palmitic acid | CSMD2   |
| palmitic acid | CSMD3   |
| palmitic acid | CXCR4   |
| palmitic acid | CXCR6   |
| palmitic acid | CXCR7   |
| palmitic acid | ATF4    |
| palmitic acid | ATF6    |
| palmitic acid | ATF6B   |
| palmitic acid | CREB1   |
| palmitic acid | CYSLTR1 |
| palmitic acid | CYSLTR2 |
| palmitic acid | CYCS    |
| palmitic acid | CYP1A1  |
| palmitic acid | CYP2B6  |
| palmitic acid | CYP2C8  |
| palmitic acid | CYP4A11 |
| palmitic acid | XCL2    |
| palmitic acid | BMX     |
| palmitic acid | ACOT7   |
| palmitic acid | DRD5    |
| palmitic acid | DRD2    |
| palmitic acid | DRD3    |
| palmitic acid | DRD4    |
| palmitic acid | OPRD1   |
| palmitic acid | GNPAT   |
| palmitic acid | ABL1    |
| palmitic acid | DSTYK   |
| palmitic acid | TESK1   |
| palmitic acid | DNM1    |
| palmitic acid | DNM1L   |
| palmitic acid | DNM2    |
| palmitic acid | OPA1    |



|               |         |
|---------------|---------|
| palmitic acid | CD69    |
| palmitic acid | EGR1    |
| palmitic acid | EDNRB   |
| palmitic acid | EDN1    |
| palmitic acid | EDNRA   |
| palmitic acid | EDN2    |
| palmitic acid | EDN3    |
| palmitic acid | ACACB   |
| palmitic acid | ECI2    |
| palmitic acid | EPX     |
| palmitic acid | EPHA1   |
| palmitic acid | EPHA10  |
| palmitic acid | EPHA2   |
| palmitic acid | EPHA3   |
| palmitic acid | EPHA4   |
| palmitic acid | EPHA5   |
| palmitic acid | EPHA7   |
| palmitic acid | EPHA8   |
| palmitic acid | EPHB1   |
| palmitic acid | EPHB2   |
| palmitic acid | EPHB3   |
| palmitic acid | EPHB4   |
| palmitic acid | EPHB6   |
| palmitic acid | GPX5    |
| palmitic acid | FABP4   |
| palmitic acid | SELE    |
| palmitic acid | EIF2AK3 |
| palmitic acid | SLC1A3  |
| palmitic acid | SLC1A2  |
| palmitic acid | SLC1A1  |
| palmitic acid | OC90    |
| palmitic acid | SLC1A6  |
| palmitic acid | SLC1A7  |
| palmitic acid | FABP3   |
| palmitic acid | FABP5   |
| palmitic acid | FASN    |
| palmitic acid | FABP5   |
| palmitic acid | FABP4   |
| palmitic acid | FABP5   |
| palmitic acid | FABP3   |
| palmitic acid | FABP2   |
| palmitic acid | FABP1   |
| palmitic acid | REG3G   |
| palmitic acid | GPR173  |
| palmitic acid | TBL1X   |
| palmitic acid | TBL1XR1 |
| palmitic acid | FGFR1   |
| palmitic acid | FGFR2   |
| palmitic acid | FGFR3   |
| palmitic acid | FGFR4   |
| palmitic acid | FGFRL1  |
| palmitic acid | FKBP1A  |
| palmitic acid | NPVF    |
| palmitic acid | FOXO3   |
| palmitic acid | FHL2    |
| palmitic acid | FFAR1   |
| palmitic acid | FFAR2   |
| palmitic acid | FFAR3   |
| palmitic acid | FURIN   |

|               |         |
|---------------|---------|
| palmitic acid | FURIN   |
| palmitic acid | G0S2    |
| palmitic acid | GALR1   |
| palmitic acid | GALR2   |
| palmitic acid | GALR3   |
| palmitic acid | GM2A    |
| palmitic acid | GIP     |
| palmitic acid | GIPR    |
| palmitic acid | GAST    |
| palmitic acid | CCKBR   |
| palmitic acid | GRP     |
| palmitic acid | GRPR    |
| palmitic acid | GLIPR1  |
| palmitic acid | HRK     |
| palmitic acid | GCG     |
| palmitic acid | GCGR    |
| palmitic acid | GLP1R   |
| palmitic acid | GLP2R   |
| palmitic acid | GCK     |
| palmitic acid | GPR119  |
| palmitic acid | GPX1    |
| palmitic acid | GPX2    |
| palmitic acid | GPX3    |
| palmitic acid | GPX6    |
| palmitic acid | GPX7    |
| palmitic acid | PAEP    |
| palmitic acid | SCD     |
| palmitic acid | GSK3A   |
| palmitic acid | GSK3B   |
| palmitic acid | GLTP    |
| palmitic acid | GLTP    |
| palmitic acid | GLTP    |
| palmitic acid | GPC1    |
| palmitic acid | GPC2    |
| palmitic acid | GPC3    |
| palmitic acid | GPC4    |
| palmitic acid | GPC5    |
| palmitic acid | GPC6    |
| palmitic acid | GNRHR   |
| palmitic acid | GPR12   |
| palmitic acid | GPR26   |
| palmitic acid | GPR3    |
| palmitic acid | GPR39   |
| palmitic acid | GPR4    |
| palmitic acid | GPR6    |
| palmitic acid | GPR78   |
| palmitic acid | GPR84   |
| palmitic acid | GPRC6A  |
| palmitic acid | GRHL1   |
| palmitic acid | PLA2G10 |
| palmitic acid | PLA2G2D |
| palmitic acid | PLA2G2E |
| palmitic acid | PLA2G2F |
| palmitic acid | ACBD7   |
| palmitic acid | GHSR    |
| palmitic acid | GNG2    |
| palmitic acid | GNAQ    |
| palmitic acid | GNA11   |
| palmitic acid | GNA14   |

|               |         |
|---------------|---------|
| palmitic acid | GNA15   |
| palmitic acid | ACOT1   |
| palmitic acid | GUCA1A  |
| palmitic acid | ACOT2   |
| palmitic acid | ACOT4   |
| palmitic acid | ACOT8   |
| palmitic acid | LYPLA1  |
| palmitic acid | HNF4A   |
| palmitic acid | MET     |
| palmitic acid | HNF4A   |
| palmitic acid | HNF4G   |
| palmitic acid | HAMP    |
| palmitic acid | HK2     |
| palmitic acid | HK3     |
| palmitic acid | HRH1    |
| palmitic acid | HRH2    |
| palmitic acid | HRH3    |
| palmitic acid | HRH4    |
| palmitic acid | HAL     |
| palmitic acid | HDAC3   |
| palmitic acid | RNASEL  |
| palmitic acid | CARM1   |
| palmitic acid | ADORA1  |
| palmitic acid | HNF4A   |
| palmitic acid | HNF4G   |
| palmitic acid | ADORA2A |
| palmitic acid | ADORA2B |
| palmitic acid | PSMC3IP |
| palmitic acid | HUNK    |
| palmitic acid | HMGCS1  |
| palmitic acid | HMGCS2  |
| palmitic acid | PTK7    |
| palmitic acid | INS     |
| palmitic acid | INSR    |
| palmitic acid | IRS1    |
| palmitic acid | INSRR   |
| palmitic acid | IGF1R   |
| palmitic acid | IGF1    |
| palmitic acid | IGF2    |
| palmitic acid | ITGAX   |
| palmitic acid | MX1     |
| palmitic acid | MX2     |
| palmitic acid | EIF2AK2 |
| palmitic acid | IL1B    |
| palmitic acid | IRAK1   |
| palmitic acid | IRAK3   |
| palmitic acid | IRAK2   |
| palmitic acid | IL10    |
| palmitic acid | ADIPOQ  |
| palmitic acid | GPR135  |
| palmitic acid | IL6     |
| palmitic acid | CXCL8   |
| palmitic acid | OPRK1   |
| palmitic acid | ARF1    |
| palmitic acid | ARF1    |
| palmitic acid | ARF6    |
| palmitic acid | KLRB1   |
| palmitic acid | KLRG1   |
| palmitic acid | KNG1    |

|               |                                       |
|---------------|---------------------------------------|
| palmitic acid | KISS1R                                |
| palmitic acid | LPO                                   |
| palmitic acid | LTB4R                                 |
| palmitic acid | LTC4S                                 |
| palmitic acid | MC2R                                  |
| palmitic acid | LIMK1                                 |
| palmitic acid | LIMK2                                 |
| palmitic acid | REG1A                                 |
| palmitic acid | REG1B                                 |
| palmitic acid | CES1                                  |
| palmitic acid | SLC27A1                               |
| palmitic acid | ACSL1                                 |
| palmitic acid | ACSL3                                 |
| palmitic acid | ACSL4                                 |
| palmitic acid | ACSL5                                 |
| palmitic acid | ACSL6                                 |
| palmitic acid | ACSBG1                                |
| palmitic acid | OPN1LW                                |
| palmitic acid | FCER2                                 |
| palmitic acid | LY96                                  |
| palmitic acid | LSP1                                  |
| palmitic acid | PBK                                   |
| palmitic acid | XCL1                                  |
| palmitic acid | KLRF2                                 |
| palmitic acid | LPAR1                                 |
| palmitic acid | LPAR2                                 |
| palmitic acid | LPAR3                                 |
| palmitic acid | LPAR5                                 |
| palmitic acid | LPAR6                                 |
| palmitic acid | PPT2                                  |
| palmitic acid | SCARB2                                |
| palmitic acid | AGRN                                  |
| palmitic acid | CSF1R                                 |
| palmitic acid | CLECL1                                |
| palmitic acid | KIT                                   |
| palmitic acid | MELK                                  |
| palmitic acid | LY96                                  |
| palmitic acid | MED1                                  |
| palmitic acid | ACADM                                 |
| palmitic acid | OPN1MW2 {ECO:0000312 HGNC:HGNC:26952} |
| palmitic acid | MCHR1                                 |
| palmitic acid | MCHR2                                 |
| palmitic acid | MC3R                                  |
| palmitic acid | MC4R                                  |
| palmitic acid | MC5R                                  |
| palmitic acid | MC1R                                  |
| palmitic acid | CLEC19A                               |
| palmitic acid | OPN4                                  |
| palmitic acid | GRM1                                  |
| palmitic acid | GRM5                                  |
| palmitic acid | MT1E                                  |
| palmitic acid | MT1F                                  |
| palmitic acid | MT1H                                  |
| palmitic acid | MT1X                                  |
| palmitic acid | MT2A                                  |
| palmitic acid | ALB                                   |
| palmitic acid | KISS1                                 |
| palmitic acid | MTRR                                  |
| palmitic acid | CASR                                  |

|               |         |
|---------------|---------|
| palmitic acid | RAB19   |
| palmitic acid | UCP2    |
| palmitic acid | MFN2    |
| palmitic acid | MAPK1   |
| palmitic acid | MAPK11  |
| palmitic acid | MAPK12  |
| palmitic acid | MAPK13  |
| palmitic acid | MAPK14  |
| palmitic acid | MAPK15  |
| palmitic acid | MAPK3   |
| palmitic acid | MAPK4   |
| palmitic acid | MAPK6   |
| palmitic acid | MAPK7   |
| palmitic acid | MAPK8   |
| palmitic acid | MAPK9   |
| palmitic acid | MAP3K10 |
| palmitic acid | MAP3K11 |
| palmitic acid | MAP3K7  |
| palmitic acid | MAP3K9  |
| palmitic acid | MLKL    |
| palmitic acid | MLNR    |
| palmitic acid | ABCB1   |
| palmitic acid | ABCB4   |
| palmitic acid | CHRM1   |
| palmitic acid | CHRM3   |
| palmitic acid | CHRM5   |
| palmitic acid | MUSK    |
| palmitic acid | OPRM1   |
| palmitic acid | PMP2    |
| palmitic acid | MPO     |
| palmitic acid | AGPS    |
| palmitic acid | SIRT1   |
| palmitic acid | ME1     |
| palmitic acid | NOX4    |
| palmitic acid | POR     |
| palmitic acid | NDOR1   |
| palmitic acid | KLRD1   |
| palmitic acid | NMB     |
| palmitic acid | NMBR    |
| palmitic acid | TACR3   |
| palmitic acid | NMS     |
| palmitic acid | NMU     |
| palmitic acid | NMUR1   |
| palmitic acid | NMUR2   |
| palmitic acid | NPAS2   |
| palmitic acid | NPFFR1  |
| palmitic acid | NPFFR2  |
| palmitic acid | ADRA1A  |
| palmitic acid | NPS     |
| palmitic acid | NPSR1   |
| palmitic acid | NPY1R   |
| palmitic acid | NPY2R   |
| palmitic acid | PPYR1   |
| palmitic acid | NPY5R   |
| palmitic acid | NPBWR1  |
| palmitic acid | NPBWR2  |
| palmitic acid | NTSR1   |
| palmitic acid | NTSR2   |
| palmitic acid | NTS     |

|               |          |
|---------------|----------|
| palmitic acid | SLC1A4   |
| palmitic acid | SLC1A5   |
| palmitic acid | ASAH2    |
| palmitic acid | FPR2     |
| palmitic acid | ADRA1B   |
| palmitic acid | ADRA1D   |
| palmitic acid | NOS1     |
| palmitic acid | NOS3     |
| palmitic acid | NOS2     |
| palmitic acid | KLRK1    |
| palmitic acid | OPRL1    |
| palmitic acid | TYK2     |
| palmitic acid | ADRA2A   |
| palmitic acid | ADRA2C   |
| palmitic acid | N/A      |
| palmitic acid | NCOA1    |
| palmitic acid | NCOA2    |
| palmitic acid | NCOA6    |
| palmitic acid | NCOR1    |
| palmitic acid | NR4A1    |
| palmitic acid | NRF1     |
| palmitic acid | NFYA     |
| palmitic acid | NFYB     |
| palmitic acid | NFYC     |
| palmitic acid | TRAPPC2B |
| palmitic acid | RABL6    |
| palmitic acid | O3FAR1   |
| palmitic acid | OPN3     |
| palmitic acid | QRFP     |
| palmitic acid | HCRT     |
| palmitic acid | HCRTR1   |
| palmitic acid | HCRTR2   |
| palmitic acid | GPR68    |
| palmitic acid | OLR1     |
| palmitic acid | OXTR     |
| palmitic acid | OXT      |
| palmitic acid | P2RY1    |
| palmitic acid | P2RY2    |
| palmitic acid | P2RY6    |
| palmitic acid | SIN3A    |
| palmitic acid | PPT1     |
| palmitic acid | PDX1     |
| palmitic acid | PNLIP    |
| palmitic acid | LALBA    |
| palmitic acid | PASK     |
| palmitic acid | FKBP11   |
| palmitic acid | FKBP1A   |
| palmitic acid | FKBP1A   |
| palmitic acid | PLIN2    |
| palmitic acid | CASK     |
| palmitic acid | PXDN     |
| palmitic acid | PXDNL    |
| palmitic acid | PEX11A   |
| palmitic acid | PPARA    |
| palmitic acid | PPARG    |
| palmitic acid | PPARGC1A |
| palmitic acid | PPARGC1B |
| palmitic acid | ABCB1    |
| palmitic acid | PTEN     |

|               |          |
|---------------|----------|
| palmitic acid | INPPL1   |
| palmitic acid | PDE1C    |
| palmitic acid | PLA2G2C  |
| palmitic acid | PLA2G1B  |
| palmitic acid | PLA2G2A  |
| palmitic acid | PLB1     |
| palmitic acid | GPX4     |
| palmitic acid | SERPINE1 |
| palmitic acid | CD36     |
| palmitic acid | PTAFR    |
| palmitic acid | PDGFRA   |
| palmitic acid | PDGFRB   |
| palmitic acid | PDGFRL   |
| palmitic acid | PVR      |
| palmitic acid | GM2A     |
